1 **Full title: Metabolic mechanisms of interaction within a defined gut microbiota**

2 **Short title: Interactions within microbial communities**

3 Gregory L. Medlock<sup>1</sup>, Maureen A. Carey<sup>2</sup>, Dennis G. McDuffie<sup>1</sup>, Michael B. Mundy<sup>3</sup>, Natasa Giallourou<sup>4</sup>,  
4 Jonathan R. Swann<sup>4</sup>, Glynis L. Kolling<sup>1</sup>, Jason A. Papin<sup>\*1,5,6</sup>

- 5 1. Department of Biomedical Engineering, University of Virginia, Charlottesville, Virginia, United States of  
6 America  
7 2. Department of Microbiology, Immunology, and Cancer Biology, University of Virginia, Charlottesville,  
8 Virginia, United States of America  
9 3. Center for Individualized Medicine, Mayo Clinic, Rochester, Minnesota, United States of America  
10 4. Division of Integrative Systems Medicine and Digestive Diseases, Department of Surgery and Cancer,  
11 Faculty of Medicine, Imperial College London, South Kensington, London, United Kingdom  
12 5. Division of Infectious Diseases & International Health, Department of Medicine, University of Virginia,  
13 Charlottesville, Virginia, United States of America  
14 6. Department of Biochemistry & Molecular Genetics, University of Virginia, Charlottesville, Virginia,  
15 United States of America

16 \* corresponding author, [papin@virginia.edu](mailto:papin@virginia.edu)

17 Author contributions:

18 GLM: Conceptualization, Data Curation, Formal Analysis, Investigation, Methodology, Software, Validation,  
19 Visualization, Writing - Original Draft Preparation, Writing - Review & Editing

20 MAC: Conceptualization, Investigation, Validation, Writing - Review & Editing

21 DGM: Investigation, Writing - Review & Editing

22 MBM: Investigation, Writing - Review & Editing

23 NG: Investigation, Writing - Review & Editing

24 JRS: Conceptualization, Funding Acquisition, Investigation, Project Administration, Resources, Software,  
25 Supervision, Writing - Review & Editing

26 GLK: Conceptualization, Data Curation, Funding Acquisition, Investigation, Project Administration, Resources,  
27 Supervision, Validation, Writing - Review & Editing

28 JAP: Conceptualization, Funding Acquisition, Project Administration, Resources, Supervision, Writing - Review  
29 & Editing

## Abstract

Metabolic interactions among species are ubiquitous in nature, and the fitness costs and benefits they impose often reinforce and stabilize them over time. These interactions are of particular importance in the human gut, where they have functions ranging from enhancing digestion to preventing (or exacerbating) infections. The diversity and sheer number of species present lead to the potential for a multitude of metabolic interactions among species to occur. However, identifying the mechanism and consequences of metabolic interactions between even two species is incredibly challenging. Here, we develop, apply, and experimentally test a framework for identifying potential metabolic mechanisms associated with interspecies interactions. We perform pairwise growth and metabolome profiling of co-cultures of strains from the altered Schaedler flora (ASF), a defined murine microbiota. We then apply our novel framework, which we call the Constant Yield Expectation (ConYE) model, to dissect emergent metabolic behaviors that occur in co-culture. Using the ConYE model, we identify and interrogate an amino acid cross-feeding interaction that is likely to confer a growth benefit to one ASF strain (*Clostridium sp. ASF356*) in co-culture with another strain (*Parabacteroides goldsteinii* ASF519). We experimentally validate that the proposed interaction leads to a growth benefit for this strain via media supplementation experiments. Our results reveal the type and extent of emergent metabolic behavior in microbial communities and demonstrate how metabolomic data can be used to identify potential metabolic interactions between organisms such as gut microbes. Our *in vitro* characterization of the ASF strains and interactions between them also enhances our ability to interpret and design experiments that utilize ASF-colonized animals. We anticipate that this work will improve the tractability of studies utilizing mice colonized with the ASF. Here, we focus on growth-modulating interactions, but the framework we develop can be applied to generate specific hypotheses about mechanisms of interspecies interaction involved in any phenotype of interest within a microbial community.

## 52 Introduction

53 The structure and function of microbial communities may influence human health through a variety of  
54 means [1]. However, understanding the mechanisms governing this influence is complicated by the complexity  
55 of microbial communities. Interspecies interactions within microbial communities are essential to some benefits  
56 to human health, such as colonization resistance to pathogens [2,3]. These interspecies interactions are often  
57 metabolic in nature, such as competition for metabolites essential for growth of pathogens [4–7]. Since  
58 metabolic interactions occur between distantly-[8] and closely-related [9] host-associated species, creating  
59 heuristics for identifying presence or absence of interactions based on phylogeny is challenging. However,  
60 knowledge of interactions among small subsets of community members has been shown to enable prediction  
61 of community assembly in larger communities, suggesting that constructing predictive models of population  
62 dynamics in complex microbial communities may be a tractable problem [10]. Thus, the ability to detect  
63 metabolic interactions may greatly improve mechanistic insight into evolution within microbial communities and  
64 associations between microbial community function and host health.

65 One experimental strategy used to make studies involving microbial communities more tractable is  
66 manipulation of gnotobiotic animals (i.e. animals colonized by a defined group of microbes). While this strategy  
67 greatly reduces the complexity of host-microbe studies, knowledge of the behavior of individual microbes is  
68 generally lacking, unless classical model organisms are used in place of those naturally occurring in the  
69 host-associated community (e.g. *Escherichia coli* K12, which has not inhabited a gut since it was isolated from  
70 the stool of a diphtheria patient in 1922 [11]). To improve the value of experiments performed using gnotobiotic  
71 animals, *in vitro* experiments can be performed to characterize the behavior of the species colonizing the  
72 gnotobiotic animal. The phenotyping performed via these experiments improves our understanding of these  
73 organisms, which may improve our ability to predict and interpret how they might behave *in vivo*, as in  
74 gnotobiotic animal models.

75 The altered Schaedler flora (ASF) is a group of 8 bacterial strains used to standardize the microbiota of  
76 laboratory mice [12]. All ASF strains were isolated from the mouse gastrointestinal tract and can be grown *in*  
77 *vitro*. ASF-colonized mice remain stably colonized across mouse generations and have normalized organ  
78 physiology relative to germ-free mice [12]. Although there are known differences between the immune

79 repertoires of ASF-colonized mice and conventional mice, these differences can be exploited to test specific  
80 hypotheses (e.g. restoring the immune function with other microbes, or evaluating the role of the immune  
81 function by comparing ASF mice to conventional mice) [13,14]. ASF mice have been used widely in infectious  
82 disease research to study *Clostridium difficile* [15], *Helicobacter bilis* [16], *Salmonella enterica* [17,18], and  
83 *Cryptosporidium parvum* [19]. Additionally, some specific pathogen-free mice (e.g. from Taconic) are initially  
84 colonized with the ASF, which has led some to theorize that presence or absence of ASF strains contributes to  
85 vendor-specific differences in susceptibility to disease [20]. Further use of gnotobiotic systems such as  
86 ASF-colonized mice could greatly accelerate discovery in microbiome research, especially if the behavior of  
87 the ASF alone is well-understood.

88 Previously, we performed pairwise spent media experiments using seven of the ASF strains, in which  
89 each strain was grown in a chemically-defined medium as well as the spent medium of other strains [21]. We  
90 identified cases of putative cross-feeding and competition and the effect of those interactions on growth  
91 dynamics. However, each strain was spatially and temporally separated in this study. While spent media  
92 experiments remove many of the technical and statistical complications in inferring metabolic interactions, the  
93 interactions that are possible are different in nature than those that might occur while strains are grown in  
94 co-culture.

95 Here, we further define the interactive potential of six of the ASF strains by performing co-culture  
96 growth experiments with all pairs of strains. We identify the influence of interspecies interactions on growth of  
97 each strain, then apply a novel statistical model for inferring metabolic mechanisms of interaction from  
98 supernatant metabolomic data. We experimentally interrogate an inferred cross-feeding interaction in which  
99 one ASF strain (*Parabacteroides goldsteineii* ASF519) produces amino acids that another (*Clostridium sp.*  
100 *ASF356*) consumes, confirming that the hypothesized mechanism occurs and leads to a growth benefit for the  
101 consuming strain. With this new insight, we provide a framework for mechanistic interrogation of  
102 microbe-microbe and host-microbe interactions that can be applied to any microbial community to investigate  
103 co-culture phenotypes including growth enhancement or changes in metabolite yield.

## 104 **Results**



## Ecological interactions within the altered Schaedler flora

We collected *in vitro* data for growth of all pairwise combinations of 6 ASF strains (Fig 1A, n=6-9 biological replicates per strain pairing). Current taxonomic assignments [12] for these ASF strains are provided in Fig 1B. We determined the impact of co-culture on each strains' growth by comparing monoculture abundance after 72 hours of growth to the abundance of each strain in co-culture at the same 72 hour timepoint (strain abundance determined using hydrolysis-probe-based qPCR; total density determined using OD600; at 72 hours, all strains are in stationary phase; see Materials and Methods).

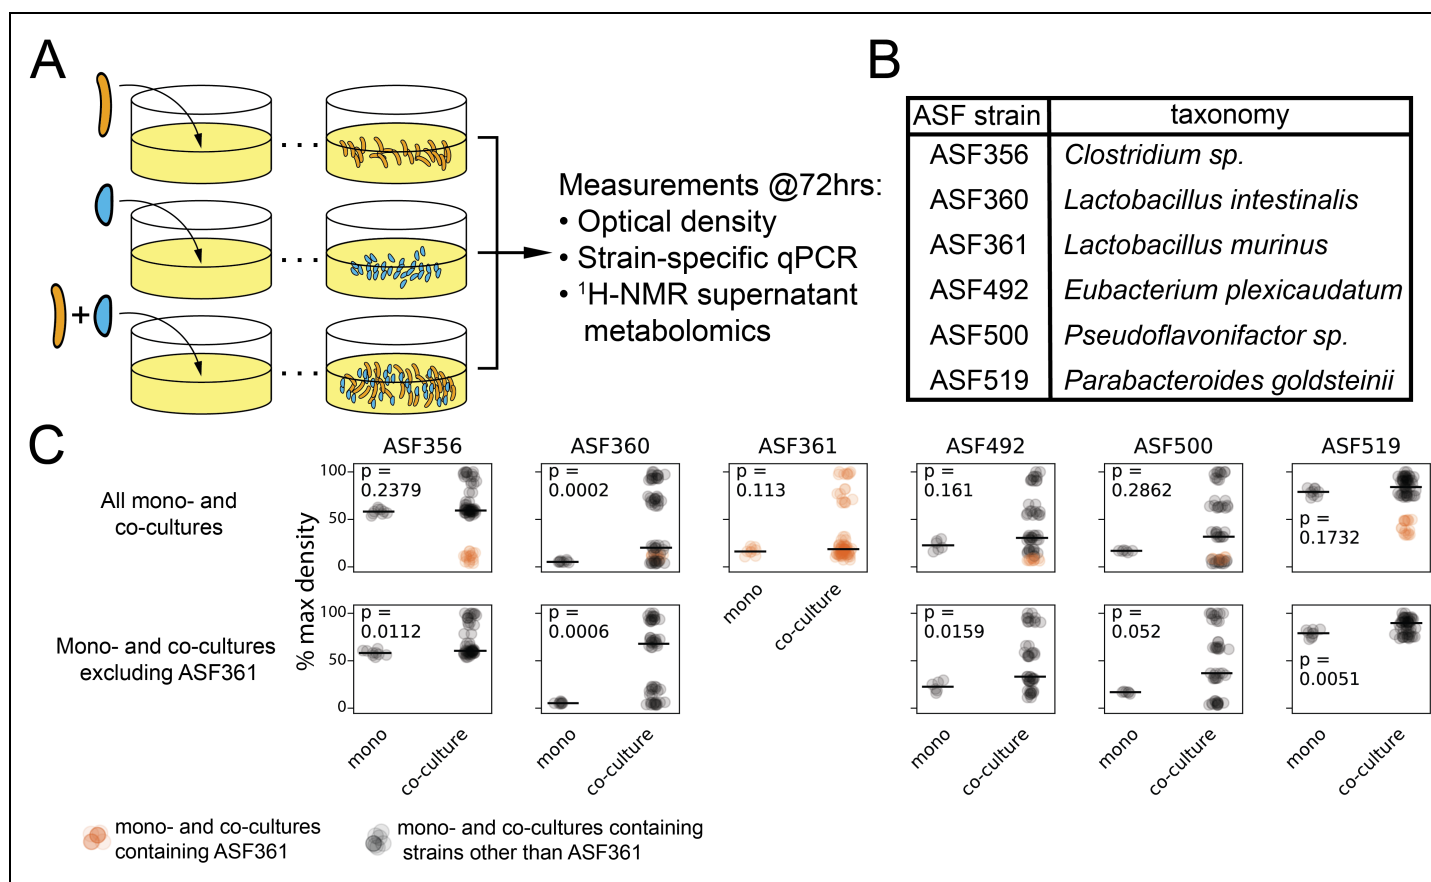

Figure 1. **A**) The experimental procedure for each pair of strains and measurements taken. **B**) Taxonomic assignment for the ASF strains included in this study. **C**) For each strain, the density after 72hrs of growth in monoculture ('mono', left in each subplot) compared to all co-cultures containing the strain in the title for the column ('co-culture', right in each subplot). Density determined using OD600. Max density for each subplot is the maximum OD600 from any sample within the subplot. Orange points represent samples from a mono- or co-culture group containing ASF361, while all other mono- and co-culture conditions are shown by black points. Black bar is mean of monoculture or co-culture within each subplot. Data presented in bottom row are identical to top row, but exclude samples containing ASF361. *p*-values were determined by two-sided Mann-Whitney *U* test with false discovery rate control using the Benjamini-Hochberg procedure.

For each strain except ASF360, the monoculture density was not significantly different than the density of all co-cultures containing that strain (Fig 1C, top row). However, we observed that ASF361 had a substantial negative impact on the density of all co-cultures that contained it. Removing co-cultures containing ASF361

124 from consideration, the co-cultures for all strains (except ASF500) grew to a higher density than the  
125 corresponding monoculture (Fig 1C, bottom row). Using DNA abundance quantified via hydrolysis  
126 probe-based quantitative polymerase chain reaction (qPCR), each strain in each pair was evaluated to  
127 determine whether a negative (-), positive (+), or neutral (0) effect on endpoint abundance occurred due to the  
128 pairing, allowing classification of the pairwise interaction with standard ecological terminology. All pairings  
129 except one, ASF356 with ASF519, had a negative impact on the abundance of at least one strain, with 0/-  
130 (amensalism), +/- (parasitism), -/- (competition), and +/- (commensalism) being the only interactions detected  
131 (8, 4, 2, and 1 instances, respectively; data shown in Fig 2A, summarized in Fig 2B and 2C). ASF361 was  
132 present in 3/4 parasitic co-cultures and in all cases was the strain in the pairing that experienced a growth  
133 benefit. In contrast, growth of both ASF492 and ASF500 was inhibited in every condition, including in  
134 co-culture with each other. Thus, co-culture led to higher total biomass production for all co-cultures except  
135 those containing ASF361 (Figure 1C), although growth of individual strains tended to be lower in co-culture  
136 than in monoculture. These observations suggests that although these strains compete for resources,  
137 differences in resource utilization across strains, or emergent behavior in co-culture such as cross-feeding and  
138 consumption of novel substrates/metabolites, may enhance efficiency in co-culture in the absence of strong  
139 negative interactions by ASF361.

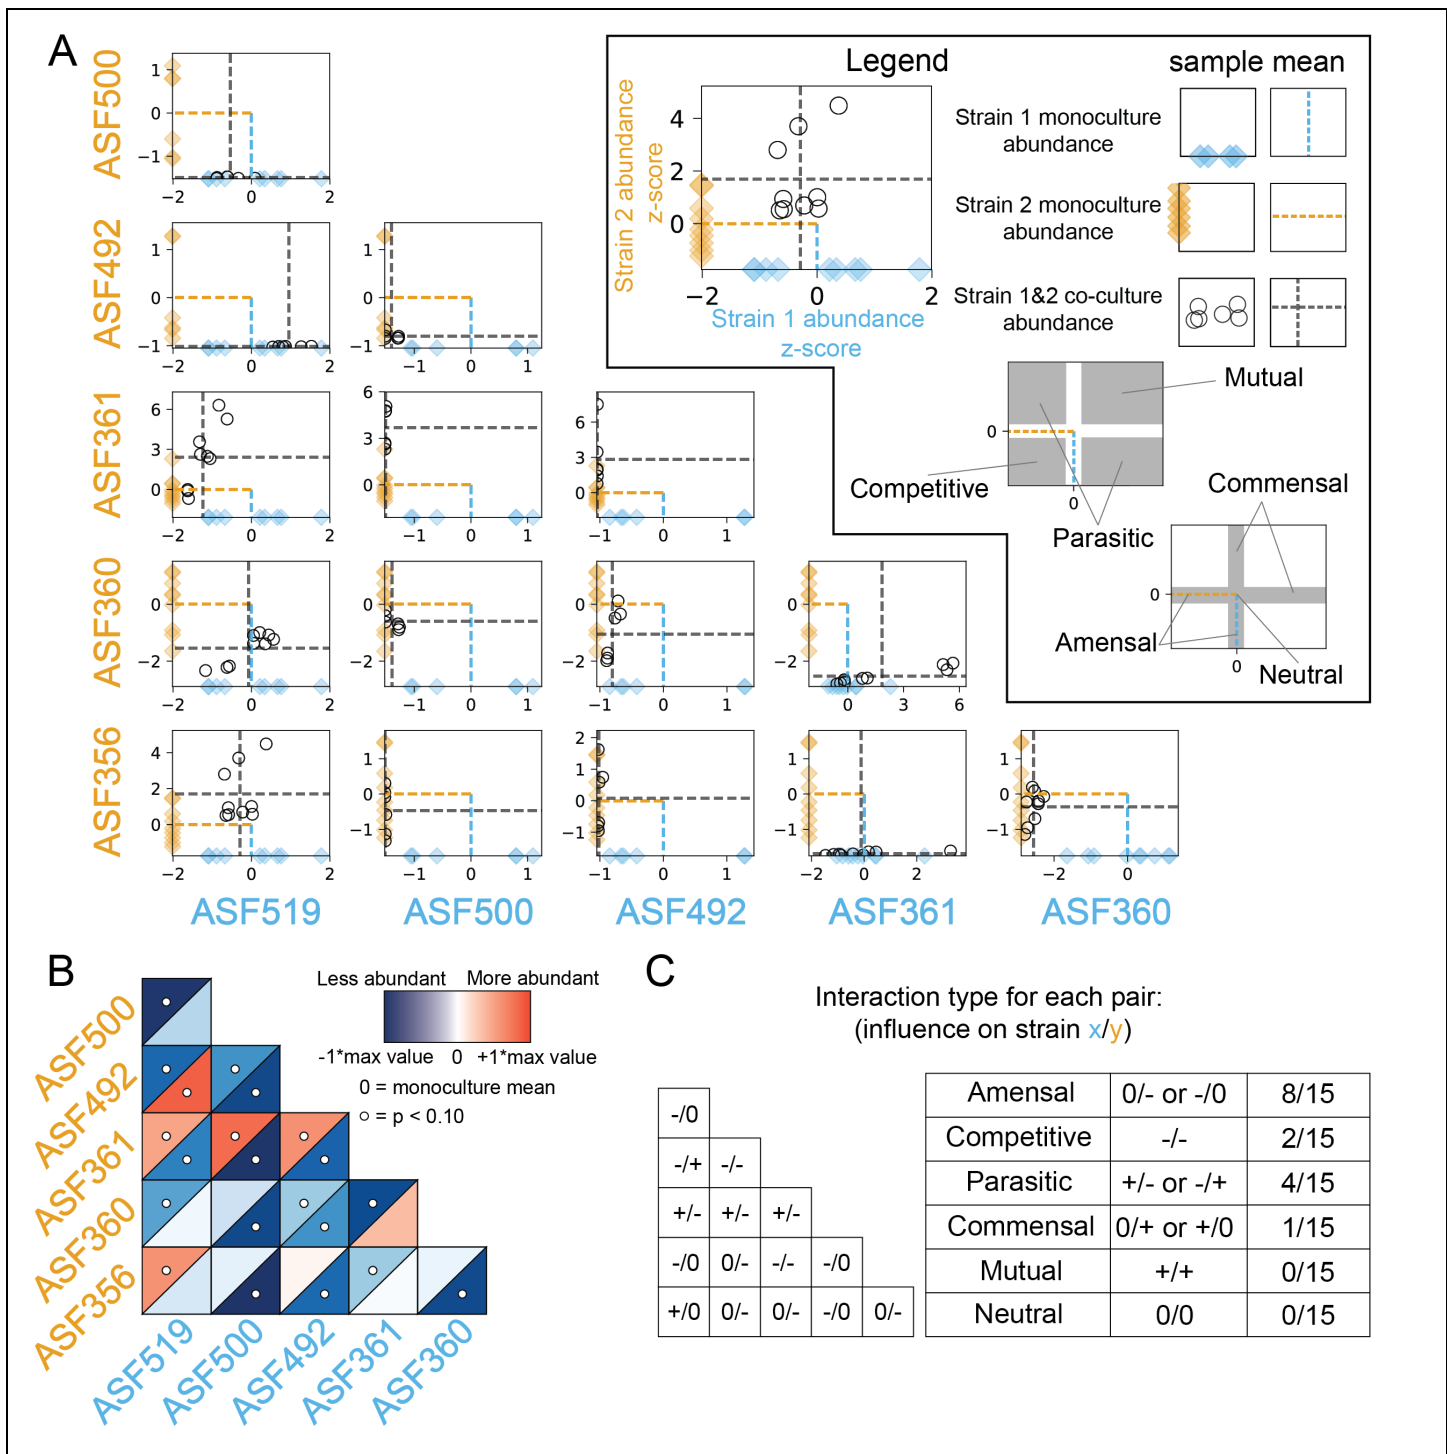

Figure 2. **A**) Abundance of each strain in monoculture and in co-culture determined via qPCR. In each subplot, the x-axis describes the abundance of the strain at the bottom of the column in sky blue text. Conversely, the y-axis describes the abundance of the strain labelled in orange text at the left of each row. The diamonds indicate the abundance of each strain in monoculture, with the mean shown by a dashed line of the same color. For each subplot, the abundance of each strain in the co-culture for the pair indicated by the row and column labels is shown by a black circle, with the mean co-culture abundances indicated by two grey dashed lines. Abundance values for each strain are z-score normalized using the mean monoculture abundance to center the data and the standard deviation of monoculture abundance to scale the data.  $N=9$  for all samples except for monocultures and co-cultures containing ASF500 or ASF492, for which  $N=6$ . **B**) Heatmap of mean abundance of each strain in co-culture relative to abundance in monoculture. Blue indicates less abundant than monoculture, while red indicates more abundant than monoculture. The upper left triangle for each square describes abundance of the strain labelled on the left side of each row, while the lower triangle describes the abundance of the strain labelled on the bottom of each column. White circles indicate that the strain was differentially abundant when comparing mono- to co-culture (significance threshold of  $p < 0.10$ ,

Mann-Whitney U test with false discovery rate correction using Benjamini-Hochberg procedure). **C)** Summary of interspecies interactions. Non-zero interactions in the triangle indicate significant differential abundance as shown in Fig 2B.

## 156 **Metabolic repertoires within the altered Schaedler flora**

157 To determine potential mechanisms governing the changes in growth observed in co-culture, we performed  
158 untargeted metabolomics on the spent supernatant from all samples in the growth experiments (using  $^1\text{H}$  NMR  
159 spectroscopy, see Materials and Methods). We updated and refined the metabolite peak annotations from  
160 experiments previously performed using the same medium and strains [21], resulting in 86 detected  
161 metabolites, 50 of which could be assigned an identity (compared to 36 of 85 metabolites previously assigned  
162 an identity). We identified several new metabolites involved in amino acid metabolism (serine, cystine,  
163 asparagine, glutamate, 2-oxoisocaproate, and isocaproate), nucleic acid metabolism (cytidine, cytosine, uridine  
164 monophosphate), and anaerobe-specific metabolism (isopropanol).

165 Based on the monoculture supernatant metabolomic profiles (Figure 3A), the ASF strains have  
166 fermentation repertoires similar to closely-related gut microbes. ASF360 and ASF361 both produced lactate,  
167 while ASF361 also produced acetate and formate. Other strains of *Lactobacillus intestinalis* and *Lactobacillus*  
168 *murinus*, the species that ASF360 and ASF361 are designated as, respectively, are generally identified as  
169 facultative heterofermentative lactic acid bacteria [22]. Heterofermentative lactic acid bacteria primarily ferment  
170 carbohydrates to lactate but may also produce additional acetate in some conditions. ASF356 produced the  
171 common fermentation end products acetate, propionate, succinate, and butyrate. Butyrate production is  
172 common in Clostridia that inhabit mammalian gastrointestinal tracts, and is often coupled with acetate  
173 production [23]. Propionate is the end product of three pathways identified in anaerobic organisms, of which  
174 the acrylate pathway and succinate pathway have been identified in *Clostridia spp.* [24]. ASF356 also  
175 produced isovalerate, isocaproate, and isobutyrate, which are common products of amino acid fermentation by  
176 some *Clostridia spp.* [25]. Butyrate and ethanol were the only common fermentation end products produced by  
177 ASF492. ASF492 has been proposed as the type strain for *Eubacterium plexicaudatum* [26], which was  
178 originally identified as producing butyrate and small amounts of acetate from glucose [27]. ASF500, a strain  
179 from the genus *Pseudoflavonifractor*, produced only formate and consumed less lactose than any other ASF  
180 strain. This suggests that lactose is not a preferred carbon source for ASF500 or another growth-limiting

181 nutrient is only present at low abundance in the medium. ASF519 produced acetate, propionate, and  
 182 succinate, consistent with previous reports on fermentation products of *Parabacteroides goldsteinii*, as well as  
 183 formate [28]. ASF519 also produced many amino acids, including histidine, lysine, alanine, isoleucine, valine,  
 184 proline, phenylalanine, glutamate, and methionine, suggesting ASF519 contains a comprehensive amino acid  
 185 biosynthesis repertoire.

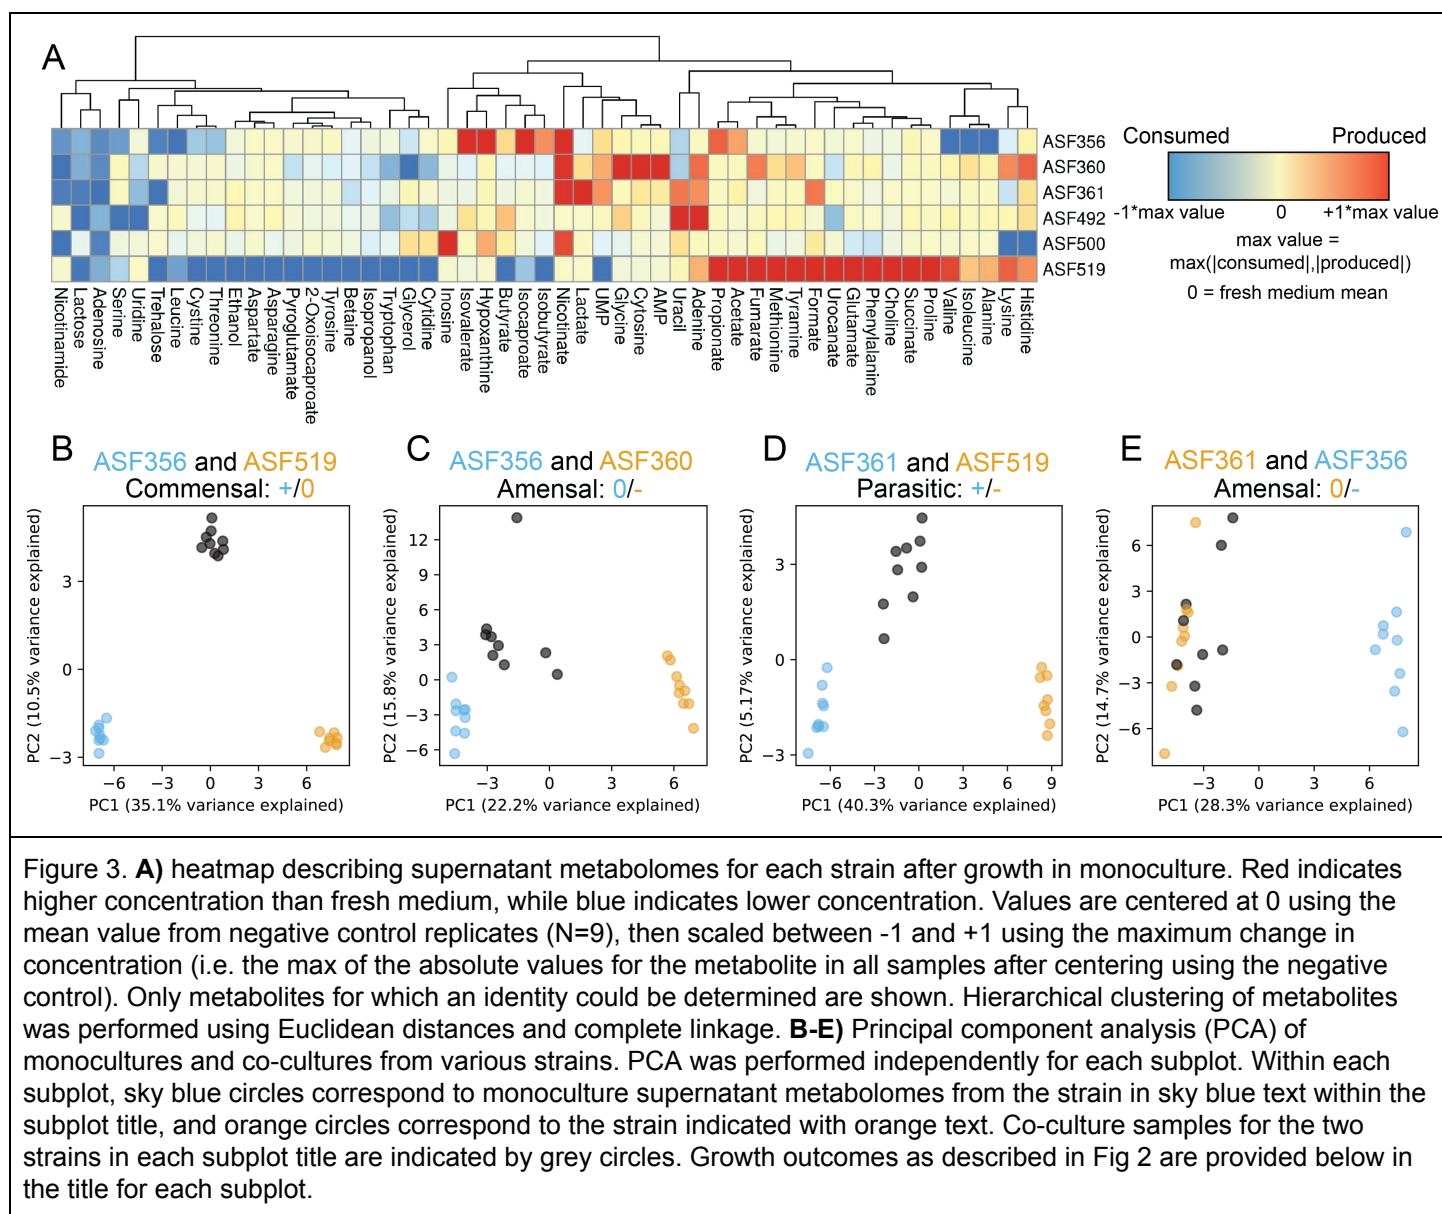

## 197 Co-culture leads to emergent metabolic behavior

198 Co-culture substantially altered the metabolome of pairings relative to each of the monoculture metabolomes  
 199 for the strains involved. To detect and quantify the emergent metabolic behavior resulting from co-culture, we  
 200 performed principal component analysis (PCA; see Materials and Methods) on the metabolic profile for pairs of

201 strains. We performed PCA separately for each pair of strains, including samples from the monoculture for  
202 each strain in the pair and the co-culture samples for the pair. In cases where both strains grew in co-culture  
203 (i.e. no strong negative growth effect on one strain), the first principal component (PC1) separated  
204 monocultures by strain and the second principal component (PC2) separated monoculture samples from  
205 co-culture samples. This behavior was particularly strong in the case of ASF356 and ASF519 (Fig 3B). For  
206 ASF356 and ASF519, the loadings of PC2 suggest that co-culture increased production of propionate, glycine,  
207 and the amino acid fermentation products isovalerate, isocaproate, and isobutyrate, and increased  
208 consumption of multiple amino acids and lactose.

209 For pairings with a strong negative effect on one strain, the co-culture metabolomes were less similar to  
210 the negatively-affected strain than they were to the strain that did not experience the negative growth effect.  
211 For example, co-culture of ASF356 with ASF360 resulted in decreased growth of ASF360, and the co-culture  
212 samples are located closer to the ASF356 monoculture samples in PCA (Fig 3C). Although there is still an  
213 “emergent” co-culture effect observed in PC2 for this pair, the effect is also aligned with within-group variation  
214 (e.g. samples within each monoculture vary along PC2). The same trend is present for the metabolomes of  
215 ASF361, ASF519, and the co-culture of the two strains (Fig 3D). For strong negative growth outcomes (e.g.  
216 negative effect on ASF356 during co-culture with ASF361), the effect is more pronounced and there is less  
217 separation between monoculture and co-culture samples (Fig 3E).

## 218 **Co-culture enhances efficiency of resource utilization**

219 Based on the metabolic differences between monoculture and co-culture samples identified via PCA,  
220 co-culture conditions substantially altered metabolic behavior. However, the mechanism that leads to this  
221 emergent metabolic behavior is unclear, and attempting to infer the mechanism may be confounded by  
222 changes in the abundance of each strain in co-culture. We sought to create a theoretical framework to infer  
223 metabolic interactions between strains in co-culture while controlling for changes in strain abundance. We  
224 provide two examples to motivate this framework (Fig 4A). In each example, we examine a single metabolite  
225 and the behavior of that metabolite in monoculture and co-culture for a pair of strains in which one strain  
226 experienced a growth benefit in co-culture and another experienced no change in growth in co-culture.  
227 Hypothetical metabolite 1 was produced by both strains, and a yield for that metabolite for each strain can be



228 calculated by dividing its abundance by the abundance of each strain after growth in monoculture. In this case,  
229 the challenge is to determine whether the yield of that metabolite increased or decreased for either strain when  
230 the two strains are grown in co-culture. While the amount of a metabolite produced may increase in co-culture  
231 relative to in monoculture (e.g. short-chain fatty acids in co-culture of ASF356 and ASF519), a calculation that  
232 takes into account changes in strain abundance is necessary to determine whether the increase in metabolite  
233 abundance is truly emergent behavior rather than additive. Similarly, hypothetical metabolite 2 was produced  
234 by one strain and consumed by another in monoculture. Given the changes in strain abundance in co-culture,  
235 we ask whether the metabolite was cross-fed, and whether the metabolite might have contributed to changes  
236 in strain abundance observed in co-culture.

237         Based on the metabolic abundance profiles alone, it is unclear whether co-culture led to cross-feeding  
238 and/or resource competition, the two mechanisms of metabolic interaction that are based on resource  
239 allocation. If two strains consume a metabolite in monoculture, resource competition only affects growth of  
240 either strain if the metabolite is completely consumed or the concentration becomes low enough to affect  
241 growth indirectly (e.g. reduced transport/diffusion). In the case of cross-feeding, lower amounts of a metabolite  
242 produced by one strain could be due to reduced growth of that strain, rather than consumption of that  
243 metabolite by the other strain (Fig 4A). Inference of cross-fed metabolites or metabolites for which competition  
244 affected growth outcomes is thus complicated by changes in the total growth of individual strains in co-culture  
245 relative to monoculture. We developed the **Constant Yield Expectation (ConYE)** model (see Materials and  
246 Methods) to account for variable growth and aid interpretation to identify metabolites for which consumption or  
247 production behavior changed in co-culture. Within the ConYE model, we assume each strain produces or  
248 consumes a fixed quantity of each metabolite per unit biomass (i.e. constant yield). We simulate expected  
249 metabolite quantities in co-culture by multiplying the mono-culture-derived metabolite yield for each strain by  
250 the observed abundance of that strain in co-culture, then summing the expected values for each strain and the  
251 initial quantity of the metabolite present in the fresh medium (Fig 4B). For each metabolite, we test the null  
252 hypothesis that the quantity of that metabolite in co-culture is equal to that predicted by the ConYE model.  
253 Rejecting the null hypothesis for a metabolite implies that co-culture caused at least one strain to alter  
254 metabolism of that metabolite relative to its own biomass production. Throughout Fig 4 and Fig 6, we illustrate



255 the magnitude of deviation from expectation, as well as the associated  $p$ -value, for each metabolite in each  
256 co-culture condition using volcano plots (Fig 4D, all metabolites for all co-cultures shown).

257 We identified several patterns with the ConYE model results that were consistent across sets of many  
258 metabolites, for which representative examples are shown (Fig 4C). Metabolites that were commonly  
259 consumed in monoculture were often consumed less than expected in co-culture, especially when one strain in  
260 the co-culture experienced a growth benefit (e.g. lactose). For some strains, this pattern may arise because  
261 alternative metabolites are now available in co-culture that can be consumed to produce biomass, decreasing  
262 the amount of lactose required to produce a unit of biomass for that strain. Similarly, another pattern involves  
263 fermentation end products, which were generally less abundant than expected. For example, lactate, which  
264 was produced by ASF360 and ASF361, was less abundant than expected in 7/9 co-cultures containing either  
265 of the strains. Possible explanations for this pattern align with explanations for the first pattern; individual  
266 strains may be utilizing alternative metabolites to produce biomass, resulting in less production of their primary  
267 fermentation products. An alternative explanation is that other strains in the co-culture are consuming the  
268 fermentation end product, as may be the case for lactate (ASF356, ASF492, and ASF519 all consumed lactate  
269 present in the fresh medium). Similar explanations may fit the behavior of other metabolites that are not end  
270 products of fermentation, such as valine. Valine was consumed by some strains and produced by others, but  
271 the null hypothesis for valine was only rejected for 3/15 co-cultures. In cases where one strain produced a  
272 metabolite in monoculture (e.g. ASF519 producing valine) and another strain consumed the metabolite in  
273 monoculture (e.g. ASF356 consuming valine), failure to reject the null hypothesis even when one species  
274 experienced a growth benefit (e.g. ASF356 co-cultured with ASF519) suggests that a metabolite may have  
275 been cross-fed.

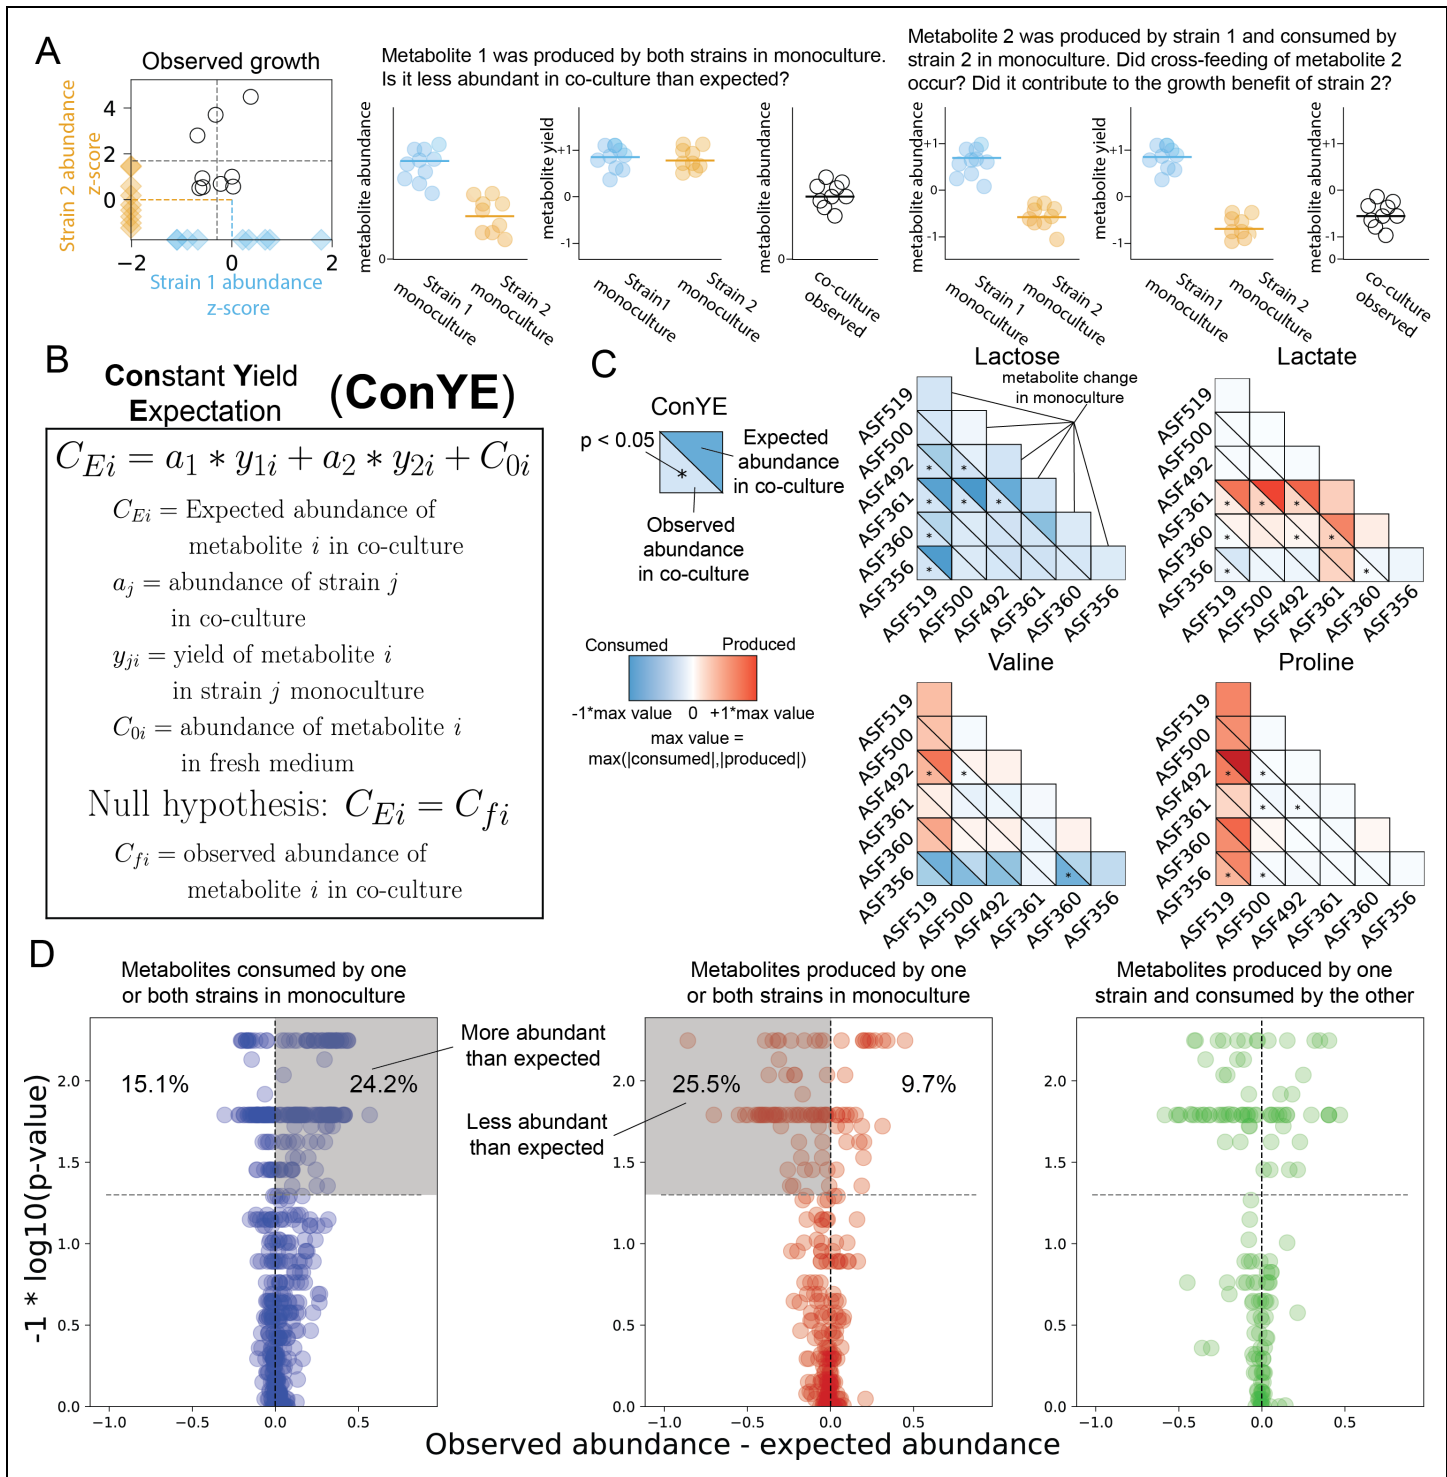

Figure 4. **A**) Hypothetical case representing examples where differential metabolite yield of a produced metabolite (metabolite 1) or cross-feeding (metabolite 2) may have occurred in co-culture given the growth outcomes for strain 1 and 2. **B**) Equation and procedure for the constant yield expectation (ConYE) model. **C**) Examples of ConYE results for Lactose, Lactate, Valine, and Proline. The diagonal represents monoculture behavior for each strain. Every other pair of triangles indicates the observed metabolite abundance in co-culture (lower left), the expected metabolite abundance in co-culture (upper right), and whether there was a significant difference between the observed and expected values. Max value for color scale determined by the max of the absolute value of metabolite z-scores across all monocultures and co-cultures. Null hypothesis testing was performed with Mann-Whitney  $U$ -Test with false discovery rate (FDR) control using the Benjamini-Hochberg procedure across all 1290 comparisons (15 co-cultures, each with 86 metabolites). Asterisk in lower left triangle indicates  $p < 0.05$  for the given metabolite in the co-culture containing the indicated strains. **D**) ConYE results for all strain pairings for metabolites that were consumed by one or both strains in monoculture (left, blue), produced by one or both strains in monoculture (middle, red), or produced by one strain in

monoculture and consumed by the other strain in monoculture (right, green). In each subplot, each point represents a single metabolite in a specific co-culture pair (i.e. up to 1290 points are represented across all subplots, representing all combinations of metabolites and unique strain pairs). The x axis describes difference between observed and expected metabolite abundance in co-culture (scaled as in panel C), and the y axis represents the FDR-adjusted  $p$ -value derived by comparing the ConYE model to observed metabolite abundances. Points above grey line have  $p < 0.05$ . Points in shaded region in left subplot (blue) are metabolites that were more abundant in co-culture than expected. Points in the shaded region in middle subplot (red) are metabolites that were less abundant than expected in co-culture. Percentages shown are the percentage of points in the labelled quadrant relative to the rest of the points in the subplot.

296 As demonstrated by considering these examples, interpretation of rejecting the null hypothesis can be  
297 informed by considering how the concentration of the metabolite changed in monoculture. If one or both strains  
298 consumed a metabolite in monoculture (Fig 4D, left, all co-cultures shown), rejecting the null hypothesis  
299 implies the metabolite was consumed more or less than expected, or that one of the strains produced the  
300 metabolite in co-culture (e.g. emergent production). Conversely, if one or both strains produced a metabolite in  
301 monoculture (Fig 4D, middle), rejecting the null hypothesis implies the metabolite was produced more or less  
302 than expected, or that one of the strains consumed the metabolite in co-culture (which, again, was not  
303 observed in monoculture for that strain). For both the production and consumption cases, cross-feeding is still  
304 possible, but in limited situations (e.g. emergent consumption or production by one strain).

305 In the case where a metabolite was consumed by one strain in monoculture and produced by the other  
306 strain in monoculture (Fig 4D, right), there are four possible interpretations if the null hypothesis is rejected. If  
307 the metabolite was less abundant than expected, then at least one of two conclusions is true: 1) the consumer  
308 metabolized more of the metabolite than expected, or 2) the producer produced less. If the metabolite was  
309 more abundant than expected, the opposite is true (producer produced more or consumer consumed less). If  
310 the null hypothesis is not rejected, the strains either maintained their production and consumption behavior  
311 from monoculture, or both scaled their consumption and production up or down, each in equal amounts. These  
312 interpretations, as well as their corresponding importance or relative contribution to a positive growth  
313 interaction for the consuming strain, are summarized in Fig 5.

### 314 **Niche expansion and cross-feeding occur with positive growth-modulating interactions**

315 After applying ConYE to all co-cultures, the null hypothesis was rejected for 500/1290 metabolites  
316 (38.8%), suggesting that co-culture alters metabolism of a substantial portion of metabolites when taking into

317 account changes in growth that occur during co-culture. For metabolites that were consumed by one or both  
 318 strains in

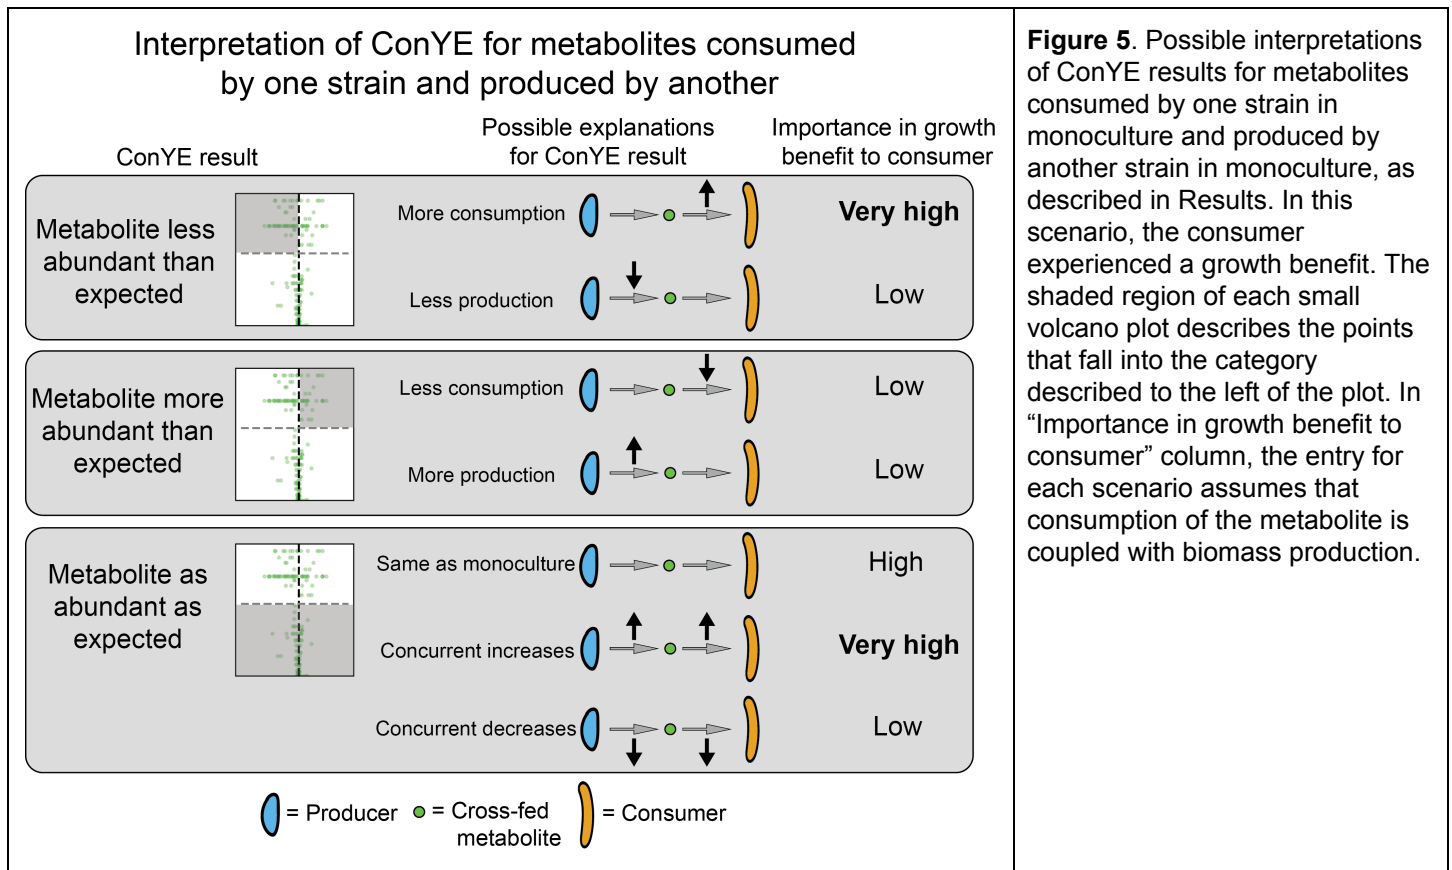

336 monoculture, the amount consumed per unit of strain growth generally decreased in co-culture if the null  
 337 hypothesis was rejected. Specifically, of the 624 instances of metabolites that fell into this category, 151  
 338 (24.2%) were significantly more abundant than expected in co-culture, whereas 94 (15.1%) were less  
 339 abundant than expected. Of the 278 instances of a metabolite being produced by one or both strains in a  
 340 pairing in monoculture, 71 (25.5%) were less abundant than expected, while 27 (9.7%) were more abundant  
 341 than expected. Thus, although co-culture often resulted in a greater quantity of a metabolite being produced  
 342 relative to either monoculture (i.e. metabolites driving monoculture and co-culture separation in PCA, Fig 3B),  
 343 the amount produced relative to growth of each strain decreased for most metabolites. Similarly, the amount of  
 344 each metabolite consumed relative to biomass in co-culture generally decreased. These results suggest that  
 345 these co-cultures can improve overall biomass production (as in Fig 1C) through niche expansion (e.g.  
 346 consuming metabolites they did not consume in monoculture) and/or cross-feeding rather than increasing  
 347 consumption of metabolites they did not fully deplete in monoculture. Indeed, 90/1290 (6.98%) metabolites

348 were not consumed or produced by either strain in monoculture, yet were consumed when the two strains were  
349 in co-culture.

350 These distinct ConYE trends are enriched in cases with positive growth interactions (Fig 6A). When  
351 considering only pairings with a positive growth effect for at least one strain, there were 219 metabolites that  
352 were consumed by one or both strains in monoculture. Of these 219 metabolites, 138 (63.0%) were more  
353 abundant than expected, while only 6 (2.74%) were less abundant than expected. Of the 88 metabolites  
354 produced by one or both strains in monoculture for these co-cultures, 51 (58.0%) were less abundant than  
355 expected, and only 5 (5.68%) were more abundant than expected. Taken together, these results indicate that  
356 co-cultures with positive interactions are able to more efficiently utilize resources than co-cultures without  
357 positive interactions or monocultures.

358 There are two mechanisms that may enable this: niche expansion (consumption of metabolites not  
359 consumed in monoculture) and cross-feeding. In co-culture, the subset of strain pairs with positive interactions  
360 consumed 30 metabolites that were not consumed by either species in monoculture. Interestingly, all 30  
361 instances of emergent metabolite consumption were carried out by ASF361+ASF492, ASF361+ASF500, and  
362 ASF492+ASF519, while the remaining two pairs (ASF356+ASF519 and ASF361+ASF519) had 0 cases of  
363 emergent consumption. Given this result, it is likely that the growth benefits that occurred for ASF356+ASF519  
364 and ASF361+ASF519 are due to cross-feeding, while the growth benefits for the other positive interaction pairs  
365 are at least in part due to niche expansion.

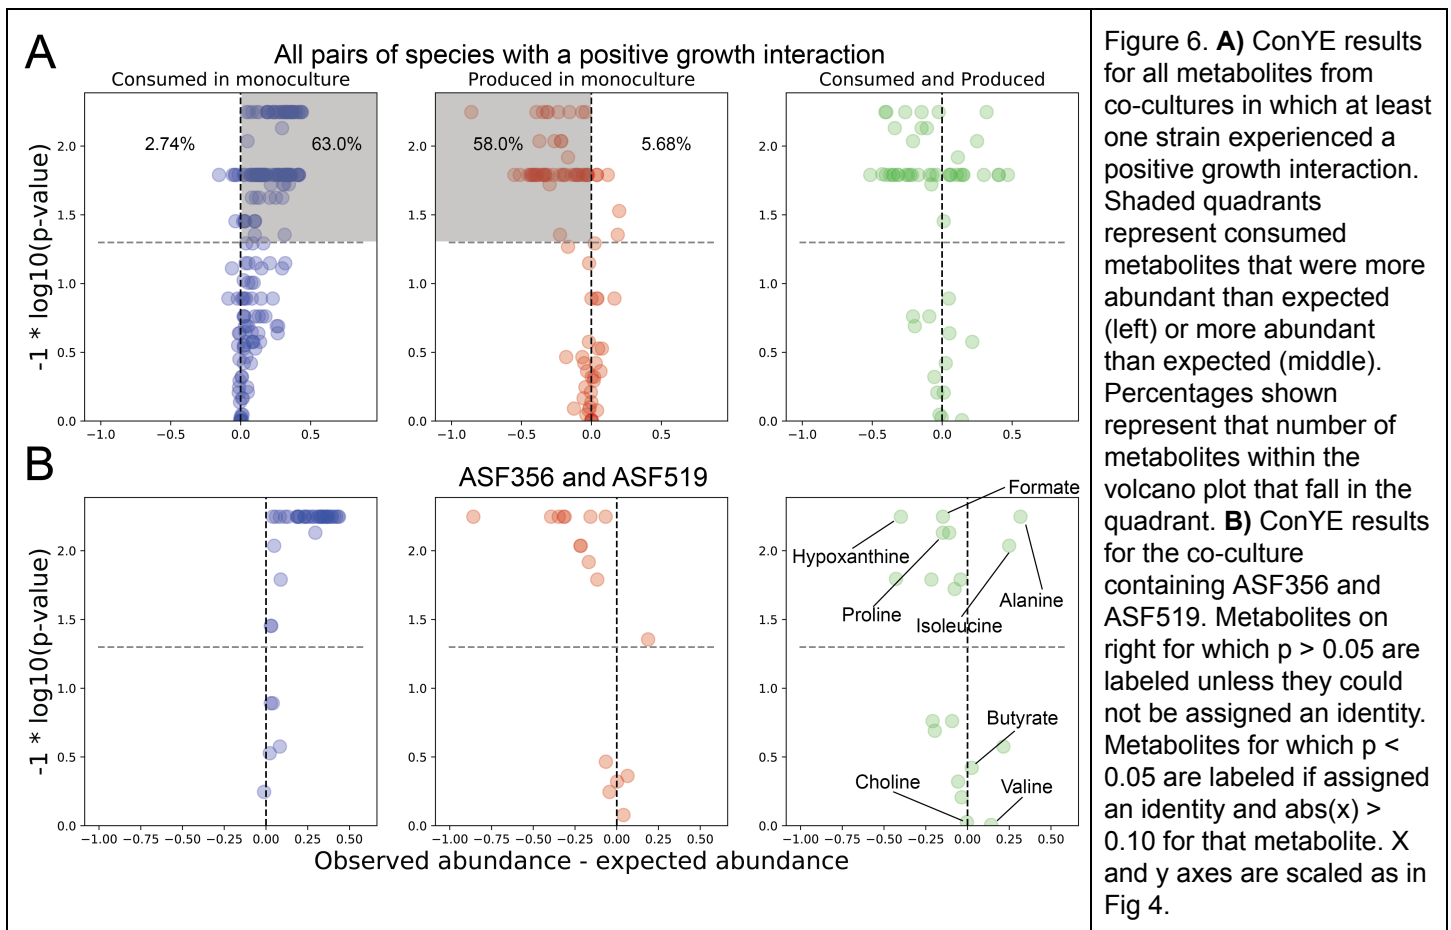

### 394 Identifying cross-fed metabolites and evaluating feasibility *in silico*

395 We next sought to investigate potential cross-fed metabolites from ConYE for co-cultures with positive  
 396 growth interactions in order to find a mechanism that explained, at least in part, the growth benefit. For this  
 397 task, we focused on the co-culture of ASF356 and ASF519 to exclude co-cultures which may have engaged in  
 398 niche expansion (and therefore cross-feeding may have played a small role in observed growth benefits) and  
 399 to remove the need to consider additional confounding factors introduced by a strong negative growth  
 400 interaction (e.g. negative impact on ASF519 growth in co-culture with ASF356). For the co-culture of ASF356  
 401 and ASF519, there were 7 named metabolites that were consumed by ASF356 in monoculture and produced  
 402 by ASF519 in monoculture (Fig 6B). Of those 7 metabolites, tyramine, valine, and choline did not result in  
 403 rejecting the null hypothesis (e.g. they were as abundant as expected). Isoleucine and alanine were more  
 404 abundant than expected, and proline and formate were less abundant than expected. Isoleucine and alanine  
 405 may have been cross-fed, but given that they were more abundant than expected, consumption of these  
 406 metabolites only contributed to enhanced growth if ASF519 also produced less of these metabolites than



407 expected (as in middle panel of Fig 5, where ASF519 is the producer and ASF356 is the consumer). Proline  
408 and formate were both less abundant than expected, so were either consumed by ASF356 more in co-culture  
409 than in monoculture (and thereby cross-fed) or produced less by ASF519 in co-culture than in monoculture (as  
410 in top panel of Fig 5).

411 ConYE can identify metabolites that are potentially cross-fed, but the actual behavior of each strain in  
412 co-culture with respect to that metabolite is difficult to infer using existing experimental techniques. Because we  
413 can only evaluate the co-culture behavior based on an expectation derived from monoculture behavior, it is still  
414 possible that co-culture leads to reduced production and consumption of those metabolites rather than  
415 cross-feeding. We sought to provide orthogonal evidence for ConYE results by evaluating the potential for  
416 metabolites to increase the growth rate of a strain in monoculture, reasoning that ConYE may produce  
417 false-positive inferences if metabolites are not actually coupled with biomass production. We chose to support  
418 inferences made using ConYE by building and applying Genome-scale metabolic network reconstructions  
419 (GENREs). GENREs are mathematical representations of all metabolic reactions that an organism can carry  
420 out, and have been used extensively to predict the effect of environmental conditions on growth of bacterial  
421 species [29]. We created an ensemble of 100 GENREs for each strain in this study to gain greater confidence  
422 in cross-feeding predictions and to enable predictive modeling of metabolism in future studies (Fig 7A and 7B;  
423 See Materials and Methods). For each metabolite, we evaluated its impact on growth of individual strains by  
424 performing ensemble flux balance analysis (EnsembleFBA) [30] to predict the growth rate of the strain without  
425 the metabolite available and with the metabolite available in excess (Materials and Methods). We performed  
426 this procedure for the candidate metabolites involved in cross-feeding interactions that increased growth of  
427 ASF356 when co-cultured with ASF519 (in which case ASF356 experienced a growth benefit). If a metabolite  
428 increases the predicted *in silico* growth rate when available in excess, we take that as parallel evidence to  
429 support or oppose the ConYE-based inferences. EnsembleFBA results are summarized in Fig 7C for all  
430 metabolites except tyramine, which was not present in any GENREs within the ensemble for ASF356.



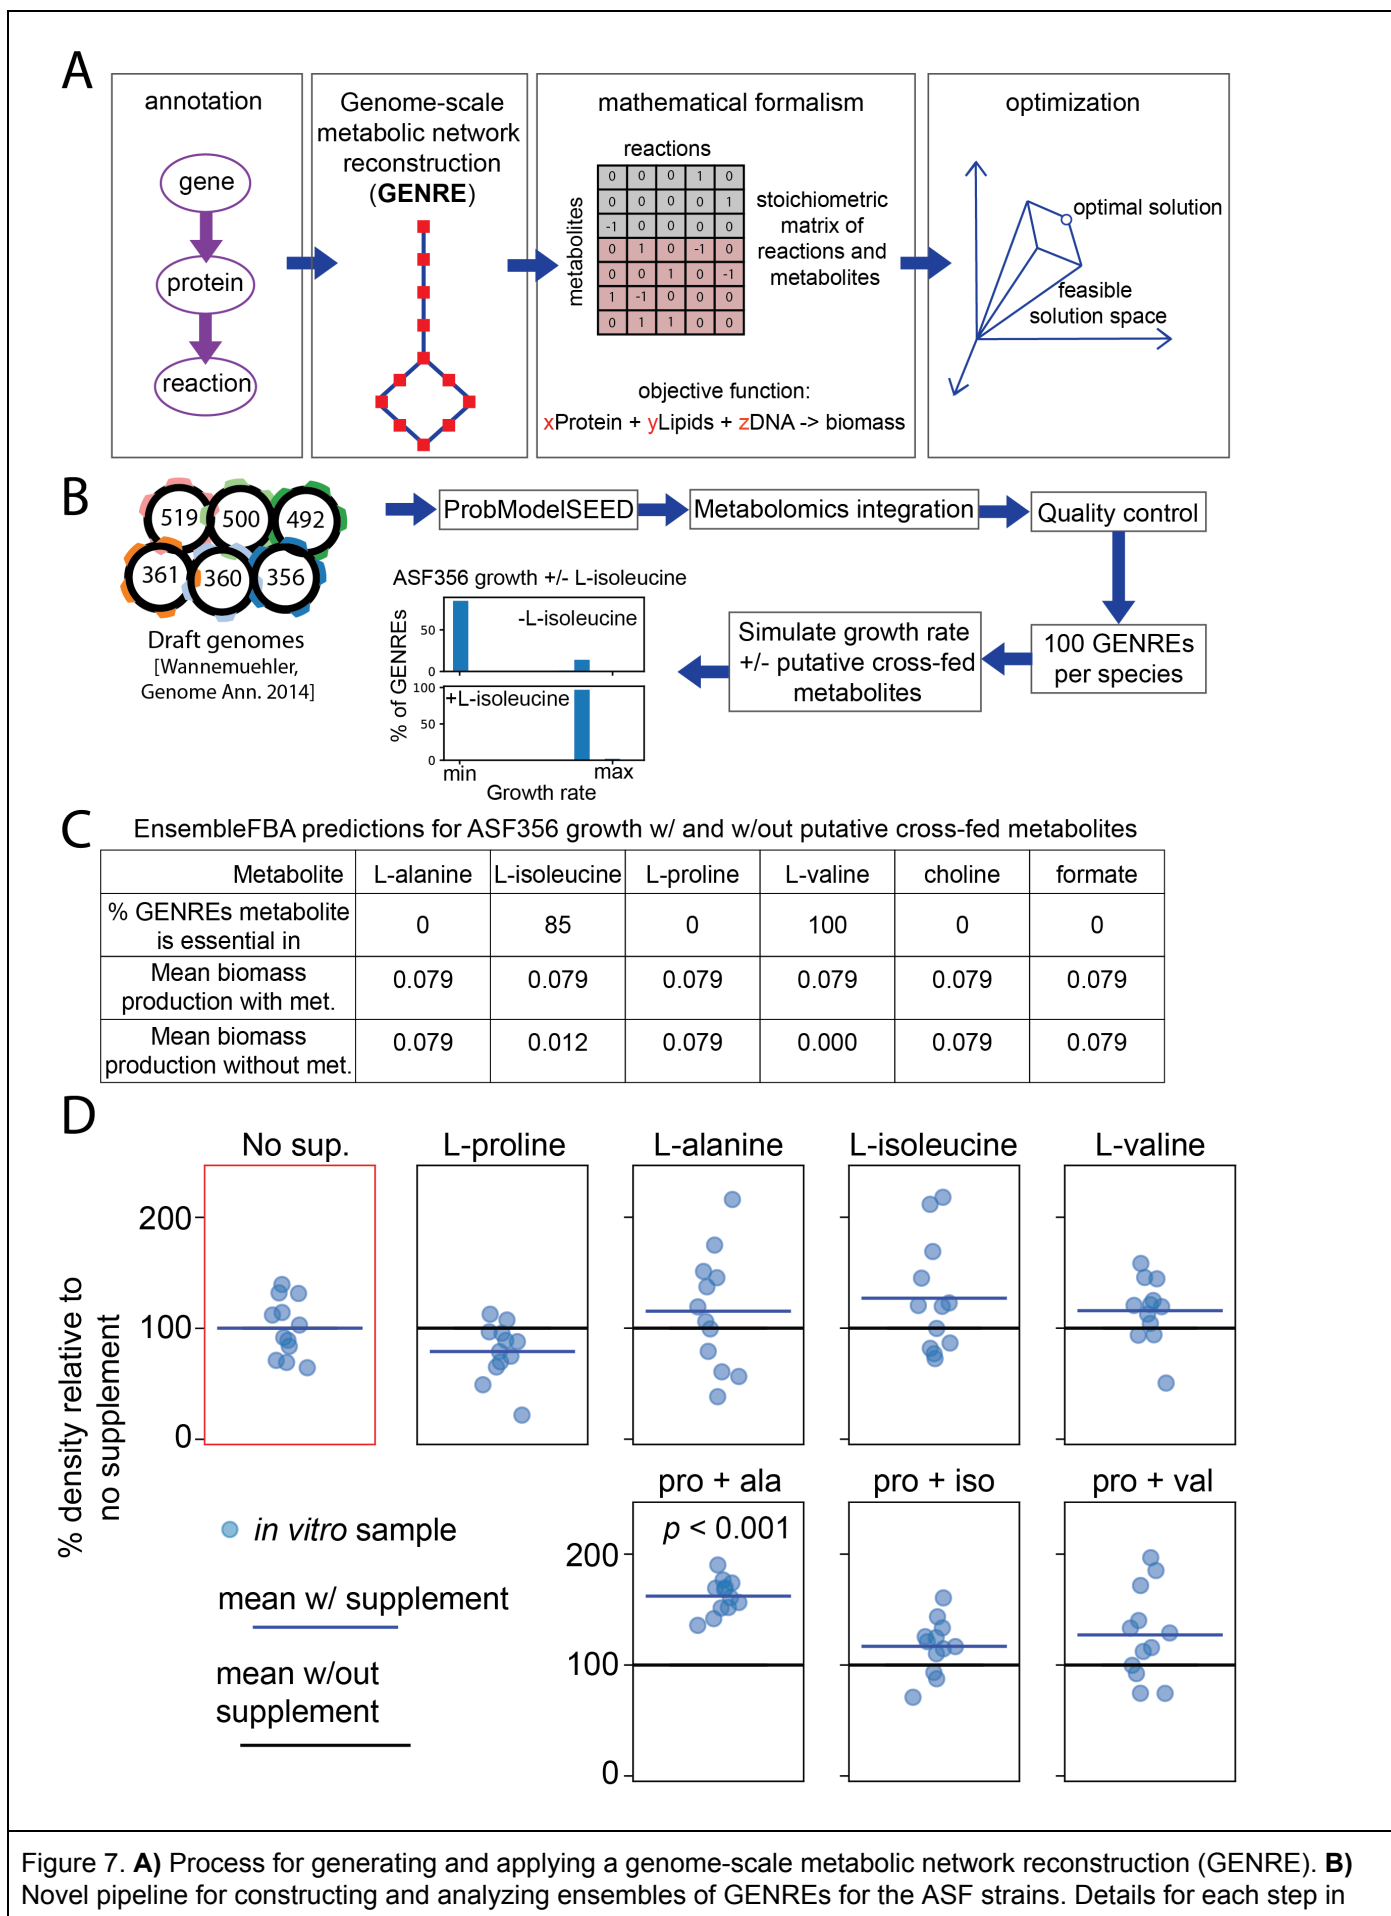

Figure 7. **A**) Process for generating and applying a genome-scale metabolic network reconstruction (GENRE). **B**) Novel pipeline for constructing and analyzing ensembles of GENREs for the ASF strains. Details for each step in

Materials and Methods. **C)** EnsembleFBA predictions of the influence of potentially cross-fed metabolites on growth of ASF356. Biomass production values are for flux through the biomass reaction in units of hour<sup>-1</sup>, and a metabolite was considered essential if removal led to flux through the biomass reaction of less than  $< 1E-5$ /hour. **D)** OD600 of ASF356 monocultures after 72 hours of growth in supplemented media conditions. "No sup." had no supplement added, while conditions with a single amino acid were supplemented at 1.25g/L. In conditions with multiple amino acids (bottom row), each of the two amino acid are still supplemented at 1.25g/L. "Pro + ala", "pro + iso", and "pro + val" conditions include L-proline with L-alanine, L-isoleucine, or L-valine, respectively.

440 Valine was essential for growth of ASF356 in all 100 GENREs in its ensemble. Isoleucine was essential  
441 for 85/100 GENREs but had no effect on growth for the other 15 GENREs, while absence of the rest of the  
442 potentially cross-fed metabolites had no effect on predicted growth rate. Given the *in silico* essentiality of valine  
443 and the ConYE results indicating valine was as abundant as expected, valine may have conferred a growth  
444 benefit to ASF356 if cross-fed between ASF356 and ASF519. While isoleucine was essential for growth of the  
445 majority of GENREs in the ASF356 ensemble, there was a subset of GENREs in which its removal had no  
446 effect. Given this *in silico* uncertainty, as well as the ConYE result which indicated it was more abundant than  
447 expected in co-culture, suggest that cross-feeding of isoleucine may not have influenced growth of ASF356 as  
448 much as valine. Alanine, proline, choline, and formate were not essential and did not influence predicted  
449 growth rates *in silico*. Critically, however, this analysis indicated that availability of any of the individual  
450 metabolites in excess did not confer a growth benefit relative to the unsupplemented medium.

#### 451 **Validation of an inferred cross-feeding interaction**

452 Given the lack of an *in silico* prediction for supplementation of any metabolite to increase the growth  
453 rate for ASF356, we considered mechanisms through which the metabolites discussed above may interact with  
454 each other to influence growth, rather than acting in isolation as we considered thus far. ASF356 belongs to the  
455 *Clostridium* genus, throughout which amino acid fermentation via the Stickland reaction is common [25]. The  
456 Stickland reaction involves coupling the oxidative deamination of one amino acid with the reductive  
457 decarboxylation of another amino acid, producing two short-chain fatty acids or branched chain fatty acids that  
458 each contain one fewer carbon than the respective amino acid from which they were derived [31]. Proline,  
459 glycine, hydroxyproline, and ornithine are strong Stickland reaction electron acceptors, while alanine, valine,  
460 leucine, and isoleucine are strong electron donors. We observed that ASF356 consumed proline, a strong  
461 electron acceptor, and all the listed electron donors in monoculture, while ASF519 produced proline, alanine,  
462 valine, and isoleucine and consumed leucine in monoculture. In co-culture, ConYE indicated that proline was

463 significantly less abundant than expected, suggesting it was consumed more per unit biomass in co-culture  
464 than in monoculture. Given this observation and the lack of growth rate increase predicted *in silico* with excess  
465 proline available, we hypothesized that proline was of critical importance to the growth benefit for ASF356 in  
466 co-culture with ASF519, but depended on the presence of suitable electron donors. Behavior varied amongst  
467 the electron donors that may pair with proline in the Stickland reaction: isoleucine and alanine were more  
468 abundant than expected, while valine was as abundant as expected. The Stickland fermentation product for  
469 proline is 5-aminovalerate, which we could not identify within our NMR spectra due to spectral overlap with  
470 other metabolites and lack of signal in regions unique to 5-aminovalerate. The products for isoleucine, valine,  
471 and alanine are valeric acid (not detected), isobutyrate (as abundant as expected), and acetate (less abundant  
472 than expected), respectively. Decreased abundance of leucine, which is fermented to isovalerate (less  
473 abundant than expected), in co-culture suggests decreased consumption by ASF356 or increased  
474 consumption of isovalerate by ASF519, which consumed isovalerate in monoculture.

475 To test the hypothesis that ASF356 experiences a growth benefit in the presence of proline and suitable  
476 electron donors, we grew ASF356 in media supplemented with proline, alanine, isoleucine, valine, or each  
477 combination of the three electron donors (alanine, isoleucine, valine) with proline. Although NMR spectroscopy  
478 cannot differentiate between amino acid isomers, we assumed all amino acids consumed and produced were  
479 the L- isoform. This assumption is unlikely to to impact our results, since tryptone, the major protein source in  
480 the medium used, is a casein digest which contains only L- isoforms. Additionally, organisms conducting  
481 Stickland fermentation of proline generally possess a proline racemase, since D-proline is the isoform that is  
482 fermented [32]. We did not use leucine in these experiments because it was consumed by both ASF356 and  
483 ASF519 in monoculture, thus was unlikely to be cross-fed in co-culture. Supplemented conditions contained  
484 either 1.25g/L of a single amino acid or 1.25g/L of each Stickland pair (e.g. 1.25g/L proline and 1.25 g/L  
485 alanine). Only the monoculture supplemented with both proline and alanine was significantly denser than  
486 monoculture with no supplement (Fig 6D,  $P < 0.05$ , Mann-Whitney *U*-test with false discovery rate control using  
487 Benjamini-Hochberg procedure), suggesting that Stickland fermentation of proline and alanine contributes to  
488 growth of ASF356. Given that the ConYE results indicated that alanine was more abundant in co-culture than  
489 expected, the results of the supplementation experiment imply that production of alanine by ASF519 was likely

490 reduced in co-culture with ASF356, or that alanine was used more efficiently by ASF356 in co-culture than in  
491 monoculture. Additionally, the lack of growth benefit conferred by concurrent supplementation of proline with  
492 isoleucine or valine suggests the growth benefit attributable to pairing either electron donor with proline either  
493 did not occur or the effect is too small to detect given our sample size. Formate can also be used as an  
494 electron donor for proline reduction as an alternative to the conventional Stickland pairs [33], which we did not  
495 take into consideration when designing these experiments. Formate was produced by ASF519 and consumed  
496 by ASF356 in monoculture, and was less abundant than expected in co-culture according to ConYE. Thus,  
497 formate may have also contributed to the growth benefit of ASF356 in co-culture with ASF519.

498 We also tested the effect of concurrent supplementation with Stickland pairs *in silico*, however the  
499 GENREs do not contain Stickland fermentation reactions and thus the predictions were no different than in the  
500 single amino acid supplement cases. Stickland reactions (e.g. D-proline reductase and glycine reductase) are  
501 absent from reaction databases used to construct and curate GENREs such as the ModelSEED biochemistry  
502 database [34] used in this study and BiGG models [35], but are present in the AGORA resource of  
503 semi-automatically generated GENREs for gut microbes [36]. None of the genes involved in Stickland  
504 fermentation have been identified in the genome of ASF356 as of this writing (determined via searching the  
505 annotated genome for ASF356 in the PATRIC database [37] and targeted BLAST against D-proline reductase  
506 gene subunits).

## 507 **Discussion**

508 In this study, we used data-driven methods to identify metabolic signatures that may contribute growth  
509 modulation in bacterial co-cultures, proposed mechanisms by which a specific signature may arise, and  
510 verified that growth of the benefiting strain can be enhanced via this mechanism. The mechanism we verified  
511 experimentally, Stickland fermentation of proline and alanine, is widely distributed in proteolytic *Clostridia*  
512 [25,31] including pathogenic species such as *Clostridium difficile* [38]. While the ability of species inhabiting the  
513 mammalian gut to perform Stickland fermentation is widely studied, this study is the first to our knowledge to  
514 connect Stickland fermentation to a specific, bidirectional interspecies interaction that modulates growth. Given  
515 that some of the end products of Stickland fermentation were present at low concentrations in the fresh

516 medium, and that ASF519 consumed them in monoculture (isobutyrate, isovalerate, and isocaproate), our data  
517 suggest that this interaction may be mutually beneficial and bidirectional. This observation supports some  
518 theoretical motifs for metabolism in the gastrointestinal tract proposed in the literature, such as the model of  
519 carbon and nitrogen flow proposed by Fischbach and Sonnenburg in which *Clostridia* (e.g. ASF356) ferment  
520 amino acids, providing ammonium and other amino acid fermentation products to *Bacteroidetes* (e.g. ASF519)  
521 [8]. Indeed, ASF356 and ASF519 are highly co-located along the mouse gastrointestinal tract, however the  
522 relevance of this observation is unclear given a microbiota as restricted in size as the ASF [39]. This kind of  
523 interaction has direct relevance to enteric pathogens, as emerging evidence indicates that *in vivo* utilization of  
524 proline via Stickland fermentation is highly active in *Clostridium difficile* during sustained infection in mice  
525 [40,41].

526 We expect that the growth outcomes observed in the co-culture of ASF356 and ASF519 are due to a  
527 multitude of interactions that each have a small effect. An alternative mechanism by which co-culture could  
528 enhance growth is consumption of growth-inhibiting products. Although we did not explore them in this study,  
529 ConYE identified several cases in which this may have occurred. For example, in the co-culture of ASF361 and  
530 ASF519, lactate, hypoxanthine, AMP, and UMP were all metabolites produced by ASF361 and consumed by  
531 ASF519 that were less abundant than expected in co-culture. Of these metabolites, lactate is known to have  
532 potent antimicrobial properties [42], thus is a reasonable candidate for this mechanism.

533 We developed ConYE to make sense of growth-modulating interactions within this study, but the  
534 framework can easily be extended to study interspecies interactions that alter other phenotypes of interest. For  
535 example, the same analyses conducted here could be performed using consumption of a substrate of interest,  
536 such as lactose, to calculate metabolite yields as a function of that substrate rather than as a function of strain  
537 abundance. In this scenario, ConYE could be used to identify co-culture pairings that enhance conversion of  
538 lactose to a metabolite of interest, and identify cross-fed metabolites that contribute to enhanced yield of that  
539 metabolite of interest.

540 There is increasing interest in developing methods for inference of interactions between microbes from  
541 various data types and environments [10,43,44]. These methods have primarily been focused on discovering  
542 interspecies interactions and the role they might play in ecosystem function, rather than ascribing mechanism

543 to those interactions. However, interspecies interactions are likely to be highly context-dependent, so more  
544 detailed knowledge about mechanisms of interaction is necessary to generalize these findings [45]. Several  
545 approaches that integrate the metabolic and spatial environment have been developed that account for context  
546 dependency [46–48], but limitations in biochemical knowledge across the bacterial tree of life limit their broad  
547 application to other organisms. Similar approaches have been applied to simplified versions of complex  
548 communities such as the human gut microbiota [48–50]. However, the poor experimental tractability of these  
549 systems makes testing predicted interspecies interactions challenging and thus they are left unvalidated.

550 We have developed a novel experimental and computational pipeline to probe interspecies interactions  
551 and infer feasible metabolic mechanisms of interaction, generating testable hypotheses. Understanding  
552 mechanisms of interspecies interaction and the environmental conditions that induce them is a prerequisite to  
553 engineering communities with specific therapeutic or industrial value. For generalizable methods for predicting  
554 interspecies interaction using mechanistic models to be successful, methods must be validated. This task will  
555 require a substantially larger set of observed interspecies interactions than are presented here, or are available  
556 in the literature, from which to derive generalizable principles. Extending our approach and similar methods to  
557 defined communities across conditions that are more diverse, both in terms of resource availability and spatial  
558 structure, will begin to make predictive modeling of interspecies interactions tractable.

## 559 Materials and Methods

### 560 **Strain maintenance**

561 All strains are identified within the manuscript by the original isolate designation numbers for the ASF [12].  
562 ASF457 was excluded from the study due to lack of detectable growth in the experimental medium, and  
563 ASF502 was excluded due to inconsistent growth in the experimental medium. Stock vials for all ASF strains  
564 were maintained at -80°C in 50% glycerol, 50% brain-heart infusion (BHI) medium (see media formulations for  
565 the composition of brain-heart infusion media used in this study). All strains were grown in an anaerobic  
566 chamber (Shellab BACTRONEZ, Sheldon Manufacturing, Inc., Cornelius, Oregon, USA) filled with mixed  
567 anaerobic gas (5% CO<sub>2</sub>, 5% H<sub>2</sub>, 90% N<sub>2</sub>). Anaerobic conditions were ensured through the use of palladium  
568 catalysts (baked at 120°C when outside the chamber and rotated daily when first entering the chamber) and  
569 anaerobic indicator strips (Oxoid, Basingstoke, UK).

### 570 **Media formulation**

571 Supplemented Brain–Heart Infusion medium, referred to as BHI throughout the manuscript: Brain–Heart  
572 Infusion base (37g/L, BD, Franklin Lakes, NJ, USA), supplemented with yeast extract (5 g/L), 0.2mL of vitamin  
573 K1 solution (0.5% vitamin K1 dissolved in 99.5% ethanol), 0.5mL/L of hemin solution (0.5 g/L dissolved in 1%  
574 NaOH, 99% deionized water), L-cysteine (0.5 g/L) and 5mL/L each of newborn calf serum, horse serum, and  
575 sheep serum. Vitamin K1, hemin, and all sera were added after autoclaving the medium. For preparation of  
576 agar plates, agar was supplemented at 12g/L.

577 Modified Lennox LB medium, referred to as mLB throughout the manuscript: 30g/L LB base in powder form  
578 (Sigma, St Louis, MO, USA) was combined with 0.376g/L L-cysteine (Sigma), 39mL of a mineral salts solution  
579 (containing 6g/L KH<sub>2</sub>PO<sub>4</sub>, 6g/L (NH<sub>4</sub>)<sub>2</sub>SO<sub>4</sub>, 12g/L NaCl, 2.5g/L MgSO<sub>4</sub>•7H<sub>2</sub>O, 1.6g/L CaCl<sub>2</sub>•2H<sub>2</sub>O, all dissolved  
580 in deionized water), 15mL/L of hemin solution (0.5 g/L dissolved in 1% NaOH, 99% deionized water), 0.3mL of  
581 vitamin K1 solution (0.5% vitamin K1 dissolved in 99.5% ethanol), 15mL/L of lactose solution (5g/L lactose  
582 dissolved in deionized water) and 15mL/L of tween 20 solution (1g/L tween 20 dissolved in deionized water).



583 All supplements made using deionized water, or that could not be autoclaved, were filter-sterilized using a  
584 0.22 $\mu$ m membrane (except the sera).

### 585 ***In vitro* monoculture and co-culture growth experiments in 12-well plates**

586 Strains were inoculated from frozen stock to grow a dense lawn on agar plates containing BHI media. Prior to  
587 inoculation, all agar plates were equilibrated inside an anaerobic chamber for at least 24 hours. Inoculated  
588 plates were incubated for 3-9 days before being used to start overnight cultures. For overnight cultures, 50mL  
589 of mLB broth in a 500mL glass flask was inoculated using a generous streak from the lawn of each strain, then  
590 each flask was covered with a Breathe-Easy membrane (Diversified Biotech, Dedham, Massachusetts, USA).  
591 After 18-24 hours of incubation at 37°C, overnight cultures were transferred to 50mL conical tubes, sealed,  
592 transferred out of the chamber, and centrifuged at 1500 xg for 5 minutes. After centrifugation, samples were  
593 transferred into the chamber, supernatant was poured off, and pellets were resuspended in 12.7mL mLB broth.  
594 The resuspension for each species was then diluted to make inoculant with the same concentration of cells as  
595 a solution at an optical density of 0.01, measured at OD600 with 100 $\mu$ L of sample volume in a flat-bottom  
596 96-well plate (with a well diameter of 0.64cm). This final inoculant was then used to inoculate mLB broth in  
597 12-well plates. For monoculture samples, 100 $\mu$ L of inoculant was added to 2.9mL of media. For co-culture  
598 samples, 100 $\mu$ L of each strain's inoculant was added to 2.8mL of media. 12-well plates were covered with a  
599 Breathe-Easy membrane, then the 12-well plate lid was placed on top of the membrane. Inoculated, covered  
600 12-well plates were incubated at 37°C for 72 hours.

601 After 72 hours of incubation, 12-well plates were removed from the incubator and membranes were  
602 opened for each well using a razor. For each well, the sample was mixed by pipetting 900 $\mu$ L three times, then  
603 1.8 mL of sample was transferred to a 2mL snap-cap tube. 200 $\mu$ L of sample was also collected after mixing  
604 and transferred to a 96-well plate to measure optical density at OD600. Samples within 2mL tubes were then  
605 transferred out of the chamber and centrifuged at 18407 xg for 2 minutes. After centrifugation, supernatant was  
606 poured directly into a 3mL syringe attached to a syringe pump filter (0.22 $\mu$ m pore size, mixed cellulose ester

607 filter) and filtered into a 2mL snap-cap tube. Cell pellets were then resuspended in 400uL Qiagen lysis buffer  
608 (Buffer ASL, Qiagen) and vortexed until thoroughly mixed. Resuspended pellets and spent media were then  
609 frozen at -80°C.

610 To ensure reproducibility, 3 experiments were performed in which independent overnight starter cultures  
611 were used to inoculate 3 samples per monoculture and co-culture condition (resulting in 9 total replicates). For  
612 the third experiment, ASF492 and ASF500 did not appear to grow in monoculture according to both OD600  
613 and qPCR, and their metabolomes did not appear significantly different than any negative controls, so all  
614 sample groups containing ASF492 and ASF500 in the third experiment were excluded from analyses. As a  
615 result, those sample groups have N = 6 replicates throughout the study.

### 616 ***In vitro* amino acid supplementation experiments**

617 Inoculant for ASF356 was prepared as described for monoculture and co-culture experiments in 12-well plates.  
618 Solutions of amino acids in deionized water were filter-sterilized (0.22µm pore size) and transferred to the  
619 anaerobic chamber and allowed to equilibrate for one week. Equilibrated solutions were mixed with liquid mLB  
620 broth (prepared as described previously), generating solutions that contained 90% mLB and 10% supplement  
621 by volume. Final concentrations were 1.25g/L for single amino acid supplements and 1.25g/L of each of two  
622 amino acids for supplements containing two amino acids (i.e. individual amino acids are at the same  
623 concentration in supplements containing one or two amino acids). 96-well plates were filled with 193µL media  
624 and 7µL inoculant (approximately the same initial density as in 12-well experiments), covered with a  
625 Breathe-Easy membrane, then incubated at 37°C for 72 hours. After incubation, the 96-well plates were  
626 removed from the anaerobic chamber, the breatheasy membrane was peeled off each plate, and the OD600  
627 was measured in the 96 well plate.

### 628 **DNA extraction**

629 Zirconia beads (1mm; BioSpec Products) were added to samples in ASL buffer (QIAmp Stool kit), and samples  
630 disrupted using a Mini-Beadbeater (15s, two times), followed by heat treatment (5 min, 90°C, 800rpm;  
631 Eppendorf Thermomixer). Debris was pelleted (14,000 xg, 1 min), and 400µL transferred to a QIAcube rotor

632 adapter. Total DNA from each sample isolated on the QIAcube using the ‘human stool’ protocol provided by  
633 the manufacturer and stored at -20°C prior to PCR. Purified DNA used for standards in PCR assays was  
634 quantified using the DeNovix dsDNA kit. DNA standards were adjusted to 2ng/μL and diluted 10-fold to  
635 generate standard curves in PCR assays.

### 636 **Hydrolysis probe-based qPCR assay design**

637 4-plex (including ASF356, ASF492, ASF502, and ASF519) and 3-plex (ASF360, ASF361, and ASF500)  
638 hydrolysis probe-based quantitative polymerase chain reaction (qPCR) assays were designed to quantify the  
639 abundance of each strain’s DNA with high specificity and throughput. Probe and primer design began with the  
640 *groEL* gene, which encodes the highly-conserved molecular chaperone protein GroEL, as a putative target.  
641 The National Center for Biotechnology Information PrimerBLAST web interface was used to identify PCR  
642 targets for each strain with minimal sequence similarity with any region in another strain’s genome [51]. PCR  
643 products ranging from 70-200 base pairs with a calculated melting temperature between 57°C and 63°C were  
644 determined, requiring at least two mismatches with unintended targets, with at least two mismatches occurring  
645 within the last five base pairs at the 3’ end. We screened the top three primer pairs for each strain returned by  
646 PrimerBLAST for sensitivity and specificity using standard SYBR green chemistry, and determined that all  
647 primers for ASF360, ASF361, and ASF500 had poor sensitivity. To identify alternative PCR products for  
648 ASF360, ASF361, and ASF500, we performed BLAST for each putative gene in each strain against all other  
649 putative genes in ASF strains. For genes with no hits (E-value > 1.0 for all comparisons), we attempted primer  
650 design using Primer-BLAST until a gene was found for each strain with at least 4 suitable primer pairs. All 4  
651 primer pairs for the remaining ASF strains were screened for specificity and sensitivity and at least one suitable  
652 primer pair was found for each strain.

653 For all 7 strains in the study, probes were then designed for each primer pair. The 7 strains were split  
654 into a 3-plex and 4-plex reaction based on typical density observed experimentally, with strains growing to  
655 higher densities in the 4-plex reaction and strains growing to lower densities in the 3-plex reaction. For each  
656 probe in each reaction, we performed multiple sequence alignment using Clustal Omega [52]. Suitable probe  
657 sequences were identified manually according to five criteria: 1) maximize the number of mismatches at the 5’

658 end of the probe, 2) probe length between 20-30 base pairs, 3) estimated melting temperature around  
659 66-70°C, 4) 35-65% GC content, and 5) no G or C at the 5' end of the probe. Final primers, products, probe  
660 sequences, and accompanying probe fluorophores and quenchers are provided in Supplemental Table S1.

661 Primers and probes were synthesized by Integrated DNA Technologies, Inc. (Coralville, Iowa, USA).  
662 PerfeCTa 5X MultiPlex qPCR ToughMix (Quantabio, Beverly, MA) was used for all reactions. Each PCR  
663 reaction (20 $\mu$ L total volume) contained ToughMix (1X concentration), 300nM of each forward primer, 300nM of  
664 each reverse primer, and 100nM of each probe, with 4 $\mu$ L of DNA sample. The optimal cycling conditions were  
665 determined to be: initial denaturation of 3min @ 95°C followed by 40 cycles of 15s @ 95°C and 30s @ 61°C.  
666 All assays achieved an efficiency between 91.4% and 100.5%, except for Cy5 quantification in the first and  
667 third of 3 total 96-well plates used in the study. These assays achieved an efficiency of 124.4% and 138.8%,  
668 respectively. Efficiency was calculated using a diluted DNA standard (10-fold dilution starting with 2ng/mL) for  
669 each strain.

## 670 **<sup>1</sup>H nuclear magnetic resonance spectroscopy-based metabolomics**

671 Samples were prepared for <sup>1</sup>H NMR spectroscopy as described by Dona et al. [53]. Samples were thawed at  
672 room temperature and centrifuged at 12,000 xg at 4°C for 10 minutes, before 540  $\mu$ L of supernatant was  
673 combined with 60  $\mu$ L of buffer (pH 7.4; 1.5mM KH<sub>2</sub>PO<sub>4</sub>, 0.1% TSP (3-(trimethylsilyl)propionic- 2,2,3,3-d<sub>4</sub> acid  
674 sodium salt) in 100% D<sub>2</sub>O) and transferred to a SampleJet NMR tube (Bruker BioSpin, Rheinstetten,  
675 Germany). Standard one-dimensional (1D) <sup>1</sup>H-NMR spectra with water pre-saturation were acquired at 300 K  
676 using a 600 MHz Avance III spectrometer (Bruker), equipped with a SampleJet autosampler (Bruker). A total of  
677 32 scans were collected into 64,000 data points for each sample. Spectra were automatically phased, baseline  
678 corrected and calibrated to the TSP resonance at  $\delta^1\text{H}$  0 in Topspin 3.1 software (Bruker). The spectra were  
679 imported into MATLAB R2014a (The Mathworks, Inc., Natick, MA, USA). Biologically irrelevant regions of the  
680 spectra were removed (TSP resonance at  $\delta^1\text{H}$  0 and residual water peak  $\delta^1\text{H}$  4.5- 5.2) before peak alignment  
681 by recursive segment-wise peak alignment (RSPA) [54]. The loadings of pairwise principal component analysis  
682 models, as well as manual comparisons between fresh media spectra and spent media of each bacterial strain,  
683 were used to identify metabolites generated or consumed in each experiment. To further identify metabolites

684 that may only have been produced or consumed in co-culture, group means for all 21 co-culture conditions  
685 were compared to fresh media across the entire spectra. The relevant regions of the spectra were integrated to  
686 calculate relative spectral intensities for each metabolite. Metabolite identities were assigned by reference to  
687 known spectra in multiple databases. For all analyses, integrals were centered by subtracting the mean value  
688 for each metabolite in the blank samples, then scaled by the maximum absolute value of all centered values  
689 (so that the minimum and maximum possible scaled values for each metabolite were -1 and +1, respectively).  
690 The peak integral values, scaled values, peak integration regions and identities, and associated R code for  
691 analysis and visualization is available in the git repository. Raw spectra are currently being submitted to the  
692 Metabolights database [55].

### 693 **Differential abundance testing**

694 DNA quantification data for each sample group (each strain in monoculture and each unique co-culture  
695 condition) were tested for normality using the Shapiro-Wilk test (implemented via the `shapiro.test` function in R  
696 version 3.4.2) [56]. The data for all but one monoculture sample groups were normally distributed, but the  
697 majority of co-culture sample groups were non-normally distributed, so the non-parametric Mann-Whitney  
698 *U*-test was chosen to test for differential DNA abundance. The same procedure was performed for the  
699 metabolomic data, and the majority of sample groups and metabolites were found to be non-normally  
700 distributed, so the Mann-Whitney *U*-test was performed to test for differential metabolite abundance as well,  
701 identifying metabolites as either produced, consumed, or unchanged based on testing results and the value of  
702 the group mean relative to the fresh media. For tests of differential abundance, the false discovery rate (FDR)  
703 was controlled using the Benjamini-Hochberg procedure [57]. For DNA differential abundance testing, the  
704 number of sample groups used for FDR control was 21 (6 monocultures and 15 co-cultures). For metabolite  
705 differential abundance testing, the number of sample groups used for FDR control was 1806 (21 mono- and  
706 co-culture groups, each with 86 integrated metabolite peaks that were tested for differential abundance against  
707 fresh media samples). The results of all normality and differential abundance testing, and notebooks  
708 performing the calculations, are available in the github repository accompanying this work.

## 709 **Constant Yield Expectation (ConYE) model**

710 For each sample group, metabolite integrals were centered by subtracting the mean value of the metabolite  
711 integral in fresh medium (i.e. negative control). Centered integrals were then scaled by the max of the absolute  
712 values across all sample groups for each metabolite, resulting in values for each metabolite being scaled  
713 between -1 and +1, with at least one sample group taking a value of -1 or +1 for each metabolite. For each  
714 monoculture sample group, the mean of each scaled, centered metabolite was then divided by the mean DNA  
715 abundance of the corresponding strain, resulting in a metabolite yield specifying the amount of increase or  
716 decrease of a metabolite per unit of DNA for each strain. For each co-culture sample, the expected  
717 concentration of each metabolite was determined by multiplying the abundance of each strain in co-culture by  
718 the monoculture-derived yield, summing the two quantities from each strain, then subtracting the concentration  
719 of the metabolite in the fresh medium using the mean across negative controls (N=9). Using the calculated  
720 expected concentration from all samples within a co-culture group, deviation from expectation was determined  
721 by comparing expected concentrations to the observed concentrations in co-culture. Differential abundance  
722 was determined using the Mann-Whitney *U*-test with FDR control via the Benjamini-Hochberg procedure [57]  
723 and the mean of differences between expected and observed concentrations were recorded. The sample size  
724 used for FDR control was 1290 (15 co-culture groups, each compared to a simulated ConYE value for each of  
725 86 metabolites). Notebooks performing the calculations for ConYE, and the results of all tests, are available in  
726 the github repository accompanying this work.

## 727 **Draft genome-scale metabolic network reconstruction**

728 Draft genome-scale metabolic network reconstructions (GENREs) were generated for ASF356, ASF360,  
729 ASF361, ASF492, ASF500, ASF502 (not included in the present study), and ASF519 using a local installation  
730 of ProbModelSEED [34,58], with draft genome sequences for the strains from the same experimental stock  
731 used in this study [59]. Briefly, ProbModelSEED annotates the genome for each organism using RAST [60],  
732 which in turn identifies metabolic functions associated with genes or sets of genes. This process results in a  
733 draft GENRE containing high-confidence reactions for each species. To enable biomass production in the

734 GENRE, gapfilling is performed with uptake enabled for any metabolite with a transporter annotated in the draft  
735 GENRE (i.e. simulating a rich medium). The resulting GENRE contains the original reactions associated with  
736 the organism's annotated genome, as well as non-gene associated reactions added to enable biomass  
737 production. ProbModelSEED also assigns reaction probabilities to each reaction that can be added during  
738 gapfilling, which are derived using sequence similarity for genes which did not meet the similarity threshold for  
739 annotation via RAST. These probabilities are incorporated during gapfilling, leading to preferential addition of  
740 reactions for which there was some genetic evidence.

### 741 **Metabolomics-constrained gapfilling**

742 After generation of draft GENREs, we added functionality to the GENREs using a previously-generated  
743 supernatant metabolomics dataset in which the same ASF strains were grown in the same medium used in this  
744 study [21]. Using the original metabolite annotations for the dataset, we constrained the GENRE for each ASF  
745 strain by forcing production and consumption of any metabolite with a z-score normalized abundance of  $> +1$   
746 or  $< -1$ , respectively. This was enforced by setting the lower bound of the exchange reaction for produced  
747 metabolites to 0.001 mmol/(g dry weight \* hour), and the upper bound for exchange reactions for consumed  
748 metabolites to -0.001 mmol/(g dry weight \* hour). The value of the constraint (0.001 mmol/(g dry weight \* hour))  
749 was chosen to be arbitrarily-low, since absolute changes in metabolite concentrations were not derived in the  
750 metabolomics dataset used for gapfilling. Then, we set the remaining boundary conditions for each GENRE to  
751 represent the medium in which they were grown (as described in the *in silico* simulations section), and forced  
752 arbitrarily low flux through the biomass reaction (0.005/hour). Then, we checked for transporters for each  
753 metabolite for each strain that enabled import (for consumed metabolites) and export (for produced  
754 metabolites). If a suitable transport reaction was not present, we added a transporter from the ModelSEED  
755 biochemistry database and constrained the directionality to be as observed (e.g. import only for consumed  
756 metabolites, export only for produced metabolites). Transporter assignments are provided in Supplemental  
757 Table S2. We then performed gapfilling using a modified version of the SMILEY algorithm [61] as implemented  
758 in Cobrapy v0.5.11. Algorithmic details are provided in Supplementary text. We used the set of all  
759 ProbModelSEED reactions for which reaction probabilities were assigned as the universal reactions for



760 gapfilling, except for reactions including O<sub>2</sub>. We weighed the penalty for addition of each of these reactions by  
761 1 -  $p$ , where  $p$  is the reaction probability, which ranges from 0 for unlikely reactions to 1 for highly likely  
762 reactions. The effect of this penalty is that high-probability reactions are assigned lower penalties, and are thus  
763 more likely to be added to the GENRE during gapfilling. For each ASF strain, metabolomics-constrained  
764 gapfilling was performed 10 times, each for 10 iterations, resulting in an ensemble of 100 GENREs. All 100  
765 GENREs for each strain were unique (i.e. none of the iterations resulted in identical reaction sets being added  
766 to the draft GENRE).

### 767 **GENRE quality control**

768 All GENREs within the ensemble for each strain were assessed for mass balance. To perform this assessment,  
769 an intracellular demand reaction was added for each metabolite in the GENRE, and all exchange reactions  
770 were closed. Flux through each demand reaction was then optimized iteratively, and demand reactions that  
771 could carry flux indicated presence of a mass-imbalanced reaction that allowed spontaneous generation of the  
772 metabolite. This process identified three reactions in the draft GENREs that were mass-imbalanced (SEED ids:  
773 rxn15543 in ASF519 GENRE; rxn33894 and rxn30984 in ASF361). These reactions were removed from the  
774 draft GENREs, and the metabolomics-constrained gapfilling process was repeated using the draft GENREs  
775 with the reactions removed. Since the draft reconstructions were generated in October 2016, these reactions  
776 have since been removed from the ModelSEED biochemistry database.

777 All GENREs within the ensemble for each strain were also assessed for infeasible ATP production, an  
778 issue commonly identified in draft-quality GENREs [62]. Using boundary conditions that mimic the *in vitro*  
779 medium (as in *in silico* simulations, below), we optimized flux through an ATP demand reaction, and found that  
780 all GENREs for all strains generated between 0.5 and 1.9 mmol ATP/(g dry weight \* hour). Normalizing this  
781 value by the uptake of lactose, which was 0.22 mmol/(g dry weight \* hour) for all strains, gives a yield range of  
782 2.27-8.64 units of ATP per unit of lactose, well within reason for anaerobic organisms (for example, *Escherichia*  
783 *coli* is known to produce 2.2-3.2 units of ATP per unit of glucose when grown anaerobically) [63]. Although  
784 erroneous energy generating cycles may be present in the GENREs presented here, the realistic ATP yield

785 determined for all GENREs suggests that they do not influence ATP production in this particular media  
786 condition, and are thus unlikely to influence simulation results.

### 787 ***In silico* simulations**

788 Flux balance analysis (FBA) was performed using version 0.8.1 of the cobrapy package [64]. Ensembles of  
789 GENREs were analyzed using Cobrapy methods through the Medusa package (unpublished,  
790 <https://github.com/gregmedlock/Medusa/>). Media composition was determined by calculating exact  
791 concentrations for defined supplements (Hemin, Vitamin K1, Lactose, Tween-20), and a concentration of 1mM  
792 was assumed to allow an uptake rate of 1 mmol/(g dry weight \* hour). For media components with  
793 approximately known concentrations in LB (amino acids), the uptake rate was set to 5 mmol/(g dry weight \*  
794 hour) based on a concentration of around 5 mM for most amino acids in LB [65]. For components detected via  
795 metabolomics that were not amino acids or supplemented, and therefore likely originated from the yeast  
796 extract in LB, the maximal uptake rate was set to 0.1mmol/(g dry weight \* hour). For *in silico* media  
797 supplements and knockouts, a metabolite was considered essential if removal of the metabolite from the *in*  
798 *silico* medium caused the flux through biomass to fall below 1E-5/hour (used because of limits of numerical  
799 precision for the solvers used; use of a lower threshold (1E-10/hr) does not affect these results).

### 800 **Code and data availability**

801 All raw and processed data and all code used in this project except software used to process raw NMR spectra  
802 are availability at [https://github.com/gregmedlock/asf\\_interactions](https://github.com/gregmedlock/asf_interactions). Where possible, Jupyter notebooks [66] are  
803 used for reproducibility and to display results alongside corresponding analyses.

## 804 **Acknowledgements**

805 We thank Michael Wannemuehler and Gregory Phillips for providing ASF strains. We acknowledge the  
806 University of Virginia Advanced Research Computing Services staff for assistance in setting up software used  
807 for gapfilling on the University of Virginia high-performance computing cluster. We thank Jie Liu for helpful  
808 guidance on hydrolysis probe design for qPCR, and Thomas Moutinho for experimental assistance performing  
809 sample extraction. We thank all members of the Papin lab for helpful project feedback.

## 810 **Financial Disclosures**

811 We acknowledge funding from National Institutes of Health R01GM108501, T32LM012416, and  
812 T32GM008136.

## References

1. Turnbaugh PJ, Ley RE, Hamady M, Fraser-Liggett CM, Knight R, Gordon JI. The human microbiome project. *Nature*. 2007;449: 804–810.
2. Britton RA, Young VB. Role of the intestinal microbiota in resistance to colonization by *Clostridium difficile*. *Gastroenterology*. 2014;146: 1547–1553.
3. Buffie CG, Pamer EG. Microbiota-mediated colonization resistance against intestinal pathogens. *Nat Rev Immunol*. 2013;13: 790–801.
4. Wilson KH, Perini F. Role of competition for nutrients in suppression of *Clostridium difficile* by the colonic microflora. *Infect Immun*. 1988;56: 2610–2614.
5. Stecher B, Hardt W-D. The role of microbiota in infectious disease. *Trends Microbiol*. 2008;16: 107–114.
6. Lawley TD, Walker AW. Intestinal colonization resistance. *Immunology*. 2013;138: 1–11.
7. Gillis CC, Hughes ER, Spiga L, Winter MG, Zhu W, Furtado de Carvalho T, et al. Dysbiosis-Associated Change in Host Metabolism Generates Lactate to Support *Salmonella* Growth. *Cell Host Microbe*. 2018;23: 54–64.e6.
8. Fischbach MA, Sonnenburg JL. Eating for two: how metabolism establishes interspecies interactions in the gut. *Cell Host Microbe*. 2011;10: 336–347.
9. Rakoff-Nahoum S, Coyne MJ, Comstock LE. An ecological network of polysaccharide utilization among human intestinal symbionts. *Curr Biol*. 2014;24: 40–49.
10. Friedman J, Higgins LM, Gore J. Community structure follows simple assembly rules in microbial microcosms. *Nat Ecol Evol*. 2017;1: 109.
11. Bachmann BJ, Others. Derivations and genotypes of some mutant derivatives of *Escherichia coli* K-12. *Escherichia coli and Salmonella: cellular and molecular biology*, 2nd ed ASM Press, Washington, DC. 1996; 2460–2488.
12. Wymore Brand M, Wannemuehler MJ, Phillips GJ, Proctor A, Overstreet A-M, Jergens AE, et al. The Altered Schaedler Flora: Continued Applications of a Defined Murine Microbial Community. *ILAR J*. 2015;56: 169–178.
13. Geuking MB, Cahenzli J, Lawson MAE, Ng DCK, Slack E, Hapfelmeier S, et al. Intestinal bacterial colonization induces mutualistic regulatory T cell responses. *Immunity*. 2011;34: 794–806.
14. Ivanov II, Atarashi K, Manel N, Brodie EL, Shima T, Karaoz U, et al. Induction of intestinal Th17 cells by segmented filamentous bacteria. *Cell*. 2009;139: 485–498.
15. Schwan C, Stecher B, Tzivelekidis T, van Ham M, Rohde M, Hardt W-D, et al. *Clostridium difficile* toxin CDT induces formation of microtubule-based protrusions and increases adherence of bacteria. *PLoS Pathog*. 2009;5: e1000626.
16. Cahill RJ, Foltz CJ, Fox JG, Dangler CA, Powrie F, Schauer DB. Inflammatory bowel disease: an immunity-mediated condition triggered by bacterial infection with *Helicobacter hepaticus*. *Infect Immun*. 1997;65: 3126–3131.
17. Stecher B, Chaffron S, Käppeli R, Hapfelmeier S, Friedrich S, Weber TC, et al. Like will to like: abundances of closely related species can predict susceptibility to intestinal colonization by pathogenic and commensal bacteria. *PLoS Pathog*. 2010;6: e1000711.

- 852 18. Brugiroux S, Beutler M, Pfann C, Garzetti D, Ruscheweyh H-J, Ring D, et al. Genome-guided design of a  
853 defined mouse microbiota that confers colonization resistance against *Salmonella enterica* serovar  
854 Typhimurium. *Nat Microbiol.* 2016;2: 16215.
- 855 19. Harp JA, Chen W, Harmsen AG. Resistance of severe combined immunodeficient mice to infection with  
856 *Cryptosporidium parvum*: the importance of intestinal microflora. *Infect Immun.* 1992;60: 3509–3512.
- 857 20. Singer SM, Nash TE. The role of normal flora in *Giardia lamblia* infections in mice. *J Infect Dis.* 2000;181:  
858 1510–1512.
- 859 21. Biggs MB, Medlock GL, Moutinho TJ, Lees HJ, Swann JR, Kolling GL, et al. Systems-level metabolism of  
860 the altered Schaedler flora, a complete gut microbiota. *ISME J.* 2017;11: 426–438.
- 861 22. Vos P, Garrity G, Jones D, Krieg NR, Ludwig W, Rainey FA, et al. *Bergey's Manual of Systematic*  
862 *Bacteriology: Volume 3: The Firmicutes.* Springer Science & Business Media; 2011.
- 863 23. Louis P, Flint HJ. Diversity, metabolism and microbial ecology of butyrate-producing bacteria from the  
864 human large intestine. *FEMS Microbiol Lett.* 2009;294: 1–8.
- 865 24. Reichardt N, Duncan SH, Young P, Belenguer A, McWilliam Leitch C, Scott KP, et al. Phylogenetic  
866 distribution of three pathways for propionate production within the human gut microbiota. *ISME J.* 2014;8:  
867 1323–1335.
- 868 25. Mead GC. The amino acid-fermenting clostridia. *J Gen Microbiol.* 1971;67: 47–56.
- 869 26. Dewhirst FE, Chien CC, Paster BJ, Ericson RL, Orcutt RP, Schauer DB, et al. Phylogeny of the defined  
870 murine microbiota: altered Schaedler flora. *Appl Environ Microbiol.* 1999;65: 3287–3292.
- 871 27. Wilkins TD, Fulghum RS, Wilkins JH. *Eubacterium plexicaudatum* sp. nov., an Anaerobic Bacterium with a  
872 Subpolar Tuft of Flagella, Isolated from a Mouse Cecum. *International Journal of Systematic Bacteriology.*  
873 1974;24: 408–411.
- 874 28. Song Y, Liu C, Lee J, Bolanos M, Vaisanen M-L, Finegold SM. “*Bacteroides goldsteinii* sp. nov.” isolated  
875 from clinical specimens of human intestinal origin. *J Clin Microbiol.* 2005;43: 4522–4527.
- 876 29. Oberhardt MA, Palsson BØ, Papin JA. Applications of genome-scale metabolic reconstructions. *Mol Syst*  
877 *Biol.* EMBO Press; 2009;5: 320.
- 878 30. Biggs MB, Papin JA. Managing uncertainty in metabolic network structure and improving predictions using  
879 EnsembleFBA. *PLoS Comput Biol.* 2017;13: e1005413.
- 880 31. Nisman B. The Stickland reaction. *Bacteriol Rev.* 1954;18: 16–42.
- 881 32. Watanabe S, Tanimoto Y, Nishiwaki H, Watanabe Y. Identification and characterization of bifunctional  
882 proline racemase/hydroxyproline epimerase from archaea: discrimination of substrates and molecular  
883 evolution. *PLoS One.* 2015;10: e0120349.
- 884 33. Kabisch UC, Gräntzdörffer A, Schierhorn A, Rücknagel KP, Andreesen JR, Pich A. Identification of  
885 d-Proline Reductase from *Clostridium sticklandii* as a Selenoenzyme and Indications for a Catalytically  
886 Active Pyruvoyl Group Derived from a Cysteine Residue by Cleavage of a Proprotein. *J Biol Chem.*  
887 1999;274: 8445–8454.
- 888 34. Henry CS, DeJongh M, Best AA, Frybarger PM, Linsay B, Stevens RL. High-throughput generation,  
889 optimization and analysis of genome-scale metabolic models. *Nat Biotechnol.* 2010;28: 977–982.
- 890 35. King ZA, Lu J, Dräger A, Miller P, Federowicz S, Lerman JA, et al. BiGG Models: A platform for integrating,

- 891 standardizing and sharing genome-scale models. *Nucleic Acids Res.* 2016;44: D515–22.
- 892 36. Magnúsdóttir S, Heinken A, Kutt L, Ravcheev DA, Bauer E, Noronha A, et al. Generation of genome-scale  
893 metabolic reconstructions for 773 members of the human gut microbiota. *Nat Biotechnol.* 2017;35: 81–89.
- 894 37. Wattam AR, Davis JJ, Assaf R, Boisvert S, Brettin T, Bun C, et al. Improvements to PATRIC, the  
895 all-bacterial Bioinformatics Database and Analysis Resource Center. *Nucleic Acids Res.* 2017;45:  
896 D535–D542.
- 897 38. Bouillaut L, Self WT, Sonenshein AL. Proline-dependent regulation of *Clostridium difficile* Stickland  
898 metabolism. *J Bacteriol.* 2013;195: 844–854.
- 899 39. Sarma-Rupavtarm RB, Ge Z, Schauer DB, Fox JG, Polz MF. Spatial distribution and stability of the eight  
900 microbial species of the altered schaedler flora in the mouse gastrointestinal tract. *Appl Environ Microbiol.*  
901 2004;70: 2791–2800.
- 902 40. Jenior ML, Leslie JL, Young VB, Schloss PD. *Clostridium difficile* Colonizes Alternative Nutrient Niches  
903 during Infection across Distinct Murine Gut Microbiomes. *mSystems.* 2017;2.  
904 doi:10.1128/mSystems.00063-17
- 905 41. Jenior ML, Leslie JL, Young VB, Schloss PD. *Clostridium difficile* differentially alters the structure and  
906 metabolism of distinct cecal microbiomes to promote persistent colonization during infection [Internet].  
907 bioRxiv. 2017. p. 211516. doi:10.1101/211516
- 908 42. Shelef LA. Antimicrobial effects of lactates: a review. *J Food Prot. International Association for Food*  
909 *Protection;* 1994;57: 445–450.
- 910 43. Xiao Y, Angulo MT, Friedman J, Waldor MK, Weiss ST, Liu Y-Y. Mapping the ecological networks of  
911 microbial communities. *Nat Commun.* 2017;8: 2042.
- 912 44. Weiss S, Van Treuren W, Lozupone C, Faust K, Friedman J, Deng Y, et al. Correlation detection strategies  
913 in microbial data sets vary widely in sensitivity and precision. *ISME J.* 2016;10: 1669–1681.
- 914 45. Chamberlain SA, Bronstein JL, Rudgers JA. How context dependent are species interactions? *Ecol Lett.*  
915 2014;17: 881–890.
- 916 46. Harcombe WR, Riehl WJ, Dukovski I, Granger BR, Betts A, Lang AH, et al. Metabolic resource allocation  
917 in individual microbes determines ecosystem interactions and spatial dynamics. *Cell Rep.* 2014;7:  
918 1104–1115.
- 919 47. Zomorodi AR, Maranas CD. OptCom: a multi-level optimization framework for the metabolic modeling and  
920 analysis of microbial communities. *PLoS Comput Biol.* 2012;8: e1002363.
- 921 48. Chan SHJ, Simons MN, Maranas CD. SteadyCom: Predicting microbial abundances while ensuring  
922 community stability. *PLoS Comput Biol.* 2017;13: e1005539.
- 923 49. Bauer E, Zimmermann J, Baldini F, Thiele I, Kaleta C. BacArena: Individual-based metabolic modeling of  
924 heterogeneous microbes in complex communities. *PLoS Comput Biol.* 2017;13: e1005544.
- 925 50. Shoaie S, Ghaffari P, Kovatcheva-Datchary P, Mardinoglu A, Sen P, Pujos-Guillot E, et al. Quantifying  
926 Diet-Induced Metabolic Changes of the Human Gut Microbiome. *Cell Metab.* 2015;22: 320–331.
- 927 51. Ye J, Coulouris G, Zaretskaya I, Cutcutache I, Rozen S, Madden TL. Primer-BLAST: a tool to design  
928 target-specific primers for polymerase chain reaction. *BMC Bioinformatics.* 2012;13: 134.
- 929 52. Sievers F, Wilm A, Dineen D, Gibson TJ, Karplus K, Li W, et al. Fast, scalable generation of high-quality



- 930 protein multiple sequence alignments using Clustal Omega. *Mol Syst Biol.* 2011;7: 539.
- 931 53. Dona AC, Jiménez B, Schäfer H, Humpfer E, Spraul M, Lewis MR, et al. Precision high-throughput proton  
932 NMR spectroscopy of human urine, serum, and plasma for large-scale metabolic phenotyping. *Anal Chem.*  
933 2014;86: 9887–9894.
- 934 54. Veselkov KA, Lindon JC, Ebbels TMD, Crockford D, Volynkin VV, Holmes E, et al. Recursive  
935 Segment-Wise Peak Alignment of Biological 1H NMR Spectra for Improved Metabolic Biomarker  
936 Recovery. *Anal Chem.* 2009;81: 56–66.
- 937 55. Kale NS, Haug K, Conesa P, Jayseelan K, Moreno P, Rocca-Serra P, et al. MetaboLights: An  
938 Open-Access Database Repository for Metabolomics Data. *Curr Protoc Bioinformatics.* Wiley Online  
939 Library; 2016; 14–13.
- 940 56. Royston JP. Algorithm AS 181: The W Test for Normality. *J R Stat Soc Ser C Appl Stat.* [Wiley, Royal  
941 Statistical Society]; 1982;31: 176–180.
- 942 57. Benjamini Y, Hochberg Y. Controlling the False Discovery Rate: A Practical and Powerful Approach to  
943 Multiple Testing. *J R Stat Soc Series B Stat Methodol.* [Royal Statistical Society, Wiley]; 1995;57: 289–300.
- 944 58. Benedict MN, Mundy MB, Henry CS, Chia N, Price ND. Likelihood-based gene annotations for gap filling  
945 and quality assessment in genome-scale metabolic models. *PLoS Comput Biol.* Public Library of Science;  
946 2014;10: e1003882.
- 947 59. Wannemuehler MJ, Overstreet A-M, Ward DV, Phillips GJ. Draft genome sequences of the altered  
948 schaedler flora, a defined bacterial community from gnotobiotic mice. *Genome Announc.* 2014;2.  
949 doi:10.1128/genomeA.00287-14
- 950 60. Aziz RK, Bartels D, Best AA, DeJongh M, Disz T, Edwards RA, et al. The RAST Server: rapid annotations  
951 using subsystems technology. *BMC Genomics.* 2008;9: 75.
- 952 61. Reed JL, Patel TR, Chen KH, Joyce AR, Applebee MK, Herring CD, et al. Systems approach to refining  
953 genome annotation. *Proc Natl Acad Sci U S A.* 2006;103: 17480–17484.
- 954 62. Fritzeimer CJ, Hartleb D, Szappanos B, Papp B, Lercher MJ. Erroneous energy-generating cycles in  
955 published genome scale metabolic networks: Identification and removal. *PLoS Comput Biol.* 2017;13:  
956 e1005494.
- 957 63. Muir M, Williams L, Ferenci T. Influence of transport energization on the growth yield of *Escherichia coli*. *J*  
958 *Bacteriol.* 1985;163: 1237–1242.
- 959 64. Ebrahim A, Lerman JA, Palsson BO, Hyduke DR. COBRAPy: COntstraints-Based Reconstruction and  
960 Analysis for Python. *BMC Syst Biol.* 2013;7: 74.
- 961 65. Sezonov G, Joseleau-Petit D, D’Ari R. *Escherichia coli* physiology in Luria-Bertani broth. *J Bacteriol.*  
962 2007;189: 8746–8749.
- 963 66. Kluyver T, Ragan-Kelley B, Pérez F, Granger BE, Bussonnier M, Frederic J, et al. Jupyter Notebooks-a  
964 publishing format for reproducible computational workflows. *ELPUB.* 2016. pp. 87–90.



## Supplementary Text

**Supplemental Table S1.** Sequences for primers, probes, and amplified products, and fluorophore and quencher pairs for each probe.

**Supplemental Table S2.** Transport reactions added to the GENRE for each species.

### ***Metabolomics-constrained gapfilling***

Metabolomics-constrained gapfilling was performed to ensure the GENRE for each species could produce biomass in the *in vitro* medium and produce and consume metabolites as determined by supernatant metabolomics. We used a modified version of the growmatch algorithm [61] with variable reaction penalties calculated in ProbModelSEED [58]. We implemented and applied the modified version of our algorithm in cobrapy v0.5.11 [64]. The algorithm is formally defined as:

Min  $\sum(c_j a_j)$  for  $j \in [0, 1, \dots, \# \text{ universal reactions}]$ , subject to:

$$Sv + Uy = 0$$

$$v_{biomass} > 0.005 \text{ hr}^{-1}$$

$$v_{lb,i} < v_i < v_{ub,i}$$

$$a_j y_{min,j} < y < a_j y_{max,j}, a \in \{0, 1\}$$

$$0.001 < v_k < v_{ub,k} \text{ for } k \in \text{Exchange reactions for produced metabolites}$$

$$v_{lb,g} < v_g < -0.001 \text{ for } g \in \text{Exchange reactions for consumed metabolites}$$

Where  $c = 1 - p$  and is the reaction cost associated with including each reaction from the universal reaction bag,  $p$  is the probability of each reaction (derived from sequence information using ProbModelSEED; reactions not assigned a probability receive a probability of 0) and  $a$  is the integer indicator for each reaction  $j$  in the universal reaction bag used during gapfilling (here, we use the ModelSEED biochemistry database).  $S$  is the stoichiometric matrix,  $v$  is the vector of fluxes through each reaction represented in the stoichiometric matrix,  $U$  is the universal reaction bag,  $y$  is the vector of fluxes through reactions in the universal reaction bag (which is multiplied by the integer  $a$  to force flux to take a zero or non-zero value),  $v_{biomass}$  is flux through the biomass

988 reaction (which we constrain to take a minimum value of  $0.005 \text{ hr}^{-1}$  to force an arbitrarily low, non-zero amount  
988 of growth),  $v_k$  are the fluxes through exchange reactions for metabolites that were designated as produced,  
988 and  $v_g$  are the fluxes through exchange reactions for metabolites that were designated as consumed.  $v_{lb}$ , the  
989 lower bound of flux through a reaction, was 0 for irreversible reactions and -1000 for reversible reactions.  $v_{ub}$ ,  
990 the upper bound of flux through a reaction, was 1000 for all reactions.  $v_{lb}$  for exchange reactions were set to  
991 -1000 for all metabolites detected in the medium by NMR spectroscopy and 0 for metabolites not detected.  
992 We performed gapfilling for 10 independent runs for each species, in which each run had 10 dependent  
993 iterations that each generate a solution containing a set of reactions that, when added to the GENRE and  
994 activated, satisfy the constraints (all metabolites can be produced and consumed as indicated, and biomass  
995 can be produced). Within each run, the penalty for each reaction was increased by setting  $c = 2c$  to  
996 encourage unique solutions. For reactions in the ModelSEED biochemistry that did not receive probabilities  
997 because they have no associated gene (e.g. spontaneous reactions), we set  $c = 100$  to discourage addition of  
998 these reactions unless they were essential for any solution to be found. After each of 10 independent runs,  
999 reaction penalties were reset to their original values prior to beginning the next run. We reduced the integrality  
1000 threshold in cobrapy to  $1\text{E-}8$  from the original value of  $1\text{E-}6$ , because the default setting returned many  
1001 solutions that did not meet the constraints applied due to numerical error for ASF361 (e.g. the reaction list  
1002 returned did not actually enable biomass production for this species because reactions from the universal  
1003 reaction bag had values for  $y$  that were below  $1\text{E-}6$ ; decreasing the integrality threshold properly returned  
1004 these reactions). For every ASF strain, all 100 GENREs constructed were unique.
